# Supplementary material for: Angular Sampling of a Monochromatic, Wide-Field-of-View Camera to Augment Next-Generation Earth Radiation Budget Satellite Observations
Source: Copernicus journal article supplement (doi:10.5194/amt-2023-7), 2023-04-05
Supplement: Supplementary file [file amt-2023-7-AC2-supplement.pdf]

Dear Anonymous Referee #2,

Thank you for taking the time to review our manuscript titled “Angular Sampling of a Monochromatic, Wide-Field-of-View Camera to Augment Next-Generation Earth Radiation Budget Satellite Observations” (amt-2023-7). We are pleased to receive your positive response, and appreciative of the thoughtful comments and suggestions. Please find our responses below that address your comments point-by-point and list the corresponding revisions made to the manuscript. Any line numbers stated hereon in correspond to those in the tracked-changes manuscript, which is appended to this response.

Best regards,

Jake Gristey (on behalf of all authors)

| <i>Reviewer comment</i>                                                                                                                                                                                                                                                                                                                                                                                                                                                                                                                                                                                                                                                                                                                                                                                                                                                                                                                                                                       | <i>Author Response</i>                                                                                                                                                                                                                                                                                                                                                                                                                                                                                                                                                                                                                                                                                                                                                                                                                                                                                                                                                                                                                                                                                                                                                                                                                                                                                                                                                                                                                                                                                                                                                                                                                                                                                                                                                                                                                 |
|-----------------------------------------------------------------------------------------------------------------------------------------------------------------------------------------------------------------------------------------------------------------------------------------------------------------------------------------------------------------------------------------------------------------------------------------------------------------------------------------------------------------------------------------------------------------------------------------------------------------------------------------------------------------------------------------------------------------------------------------------------------------------------------------------------------------------------------------------------------------------------------------------------------------------------------------------------------------------------------------------|----------------------------------------------------------------------------------------------------------------------------------------------------------------------------------------------------------------------------------------------------------------------------------------------------------------------------------------------------------------------------------------------------------------------------------------------------------------------------------------------------------------------------------------------------------------------------------------------------------------------------------------------------------------------------------------------------------------------------------------------------------------------------------------------------------------------------------------------------------------------------------------------------------------------------------------------------------------------------------------------------------------------------------------------------------------------------------------------------------------------------------------------------------------------------------------------------------------------------------------------------------------------------------------------------------------------------------------------------------------------------------------------------------------------------------------------------------------------------------------------------------------------------------------------------------------------------------------------------------------------------------------------------------------------------------------------------------------------------------------------------------------------------------------------------------------------------------------|
| <p>The paper describes an alternative approach to rapidly derive empirical ADMs for the broadband VIS channel planned for the Libera mission. These ADMs are fundamental to the derivation of the primary user products, the irradiances, from radiance observations. The proposed approach provides a clear advantage in terms of the speed of building up the ADMs during the mission and avoids the need for the broad band instrument to spend a large amount of time in the non-standard scanning modes that are required to provide the ADM observations. The subject matter is clearly within the remit of the journal and of interest to future users of the products as well as to the flux retrieval community.</p> <p>I find the overall approach interesting, and the material presented relatively convincing but have some queries about the details of the application that I outline below. I have separated these by the section of the paper that they are relevant to.</p> | <ul style="list-style-type: none"> <li>• We thank the reviewer for the summary, which nicely captures the key points of the manuscript.</li> <li>• We are glad that the reviewer finds the approach interesting and relatively convincing. The reviewer’s queries are addressed directly below.</li> </ul>                                                                                                                                                                                                                                                                                                                                                                                                                                                                                                                                                                                                                                                                                                                                                                                                                                                                                                                                                                                                                                                                                                                                                                                                                                                                                                                                                                                                                                                                                                                             |
| <p>Section 1</p> <p>Is the conversion to broadband that is proposed (fig 1) required for some other purpose such as scene identification and is the accuracy of this step important, it seems superfluous in the ADM generation given the later averaging and normalisation that occurs for each scene?</p> <p>How is scene identification of the monochromatic observations performed and how will it be matched to the VIS scene classification, is this likely to be a significant error contribution?</p>                                                                                                                                                                                                                                                                                                                                                                                                                                                                                 | <ul style="list-style-type: none"> <li>• The conversion to broadband (specifically VIS) is not required for scene identification. It is required because the camera ADM samples will serve as a proxy for the radiometer VIS angular radiances.</li> <li>• Since the angular distribution at 555 nm is very similar to VIS (e.g., Fig. 8d), we <i>could</i> simply use the angular distribution inferred from 555 nm. This seems to be the reviewer’s interpretation of the approach, which would indeed render the conversion to broadband superfluous. However, note that the angular distributions at 555 nm and VIS are not identical. For example, there are small but noticeable offsets around <math>RAA=0^\circ</math> in Fig. 8d. Therefore, we maintain the option to first convert the 555 nm radiances to VIS, which itself is expected to be a function of solar-viewing geometry and scene type. The later averaging and normalization for ADM generation occurs for each scene and SZA category, but does not account for spectral differences that depend on VZA and RAA (see the dependencies in the subscripts of Eq. 1). To clarify, we added “<i>by solar-viewing geometry and scene</i>” on L98. We believe this clarification of the approach also helps to address the reviewer comment on Section 4 (see below).</li> <li>• The Libera camera-based scene identification will initially be focused on cloud fraction at the radiometer footprint scale. It will use an adaptive thresholding approach to determine the cloud fraction by identifying each pixel in a camera ADM sample as cloudy or clear, then averaging the pixels in the ADM sample weighted by the radiometer point-spread function. Since this study is focused only on the camera angular sampling, further discussion of the</li> </ul> |

|                                                                                                                                                                                                                                                                                                                                                                                                                                                                                                                                                                                                                                                                                                                                                                                                                                                                                                                                                                                                                                                                                                                                                                                                                                                                                                                                                                                                  |                                                                                                                                                                                                                                                                                                                                                                                                                                                                                                                                                                                                                                                                                                                                                                                                                                                                                                                                                                                                                                                                                                                                                                                                                                                                                                                                                                                                                                                                                                                                                                                                                                                                                                                                                                                                                                                                                                                                                                                                                                                                                                                                  |
|--------------------------------------------------------------------------------------------------------------------------------------------------------------------------------------------------------------------------------------------------------------------------------------------------------------------------------------------------------------------------------------------------------------------------------------------------------------------------------------------------------------------------------------------------------------------------------------------------------------------------------------------------------------------------------------------------------------------------------------------------------------------------------------------------------------------------------------------------------------------------------------------------------------------------------------------------------------------------------------------------------------------------------------------------------------------------------------------------------------------------------------------------------------------------------------------------------------------------------------------------------------------------------------------------------------------------------------------------------------------------------------------------|----------------------------------------------------------------------------------------------------------------------------------------------------------------------------------------------------------------------------------------------------------------------------------------------------------------------------------------------------------------------------------------------------------------------------------------------------------------------------------------------------------------------------------------------------------------------------------------------------------------------------------------------------------------------------------------------------------------------------------------------------------------------------------------------------------------------------------------------------------------------------------------------------------------------------------------------------------------------------------------------------------------------------------------------------------------------------------------------------------------------------------------------------------------------------------------------------------------------------------------------------------------------------------------------------------------------------------------------------------------------------------------------------------------------------------------------------------------------------------------------------------------------------------------------------------------------------------------------------------------------------------------------------------------------------------------------------------------------------------------------------------------------------------------------------------------------------------------------------------------------------------------------------------------------------------------------------------------------------------------------------------------------------------------------------------------------------------------------------------------------------------|
|                                                                                                                                                                                                                                                                                                                                                                                                                                                                                                                                                                                                                                                                                                                                                                                                                                                                                                                                                                                                                                                                                                                                                                                                                                                                                                                                                                                                  | <p>scene identification approach is beyond scope. A separate manuscript is in preparation that will be dedicated to the Libera camera scene identification approach.</p>                                                                                                                                                                                                                                                                                                                                                                                                                                                                                                                                                                                                                                                                                                                                                                                                                                                                                                                                                                                                                                                                                                                                                                                                                                                                                                                                                                                                                                                                                                                                                                                                                                                                                                                                                                                                                                                                                                                                                         |
| <p>Section 3</p> <p>It is not entirely clear to me if the intention of the ADM sampling with the camera pixels is to match the nadir footprint of the Libera radiometer at all angles or to match the view angle variation in footprint size that would occur if the radiometer itself was obtaining the samples.</p>                                                                                                                                                                                                                                                                                                                                                                                                                                                                                                                                                                                                                                                                                                                                                                                                                                                                                                                                                                                                                                                                            | <ul style="list-style-type: none"> <li>• The intention is to match the camera ADM samples to the view-angle varying Libera footprint in order to replicate the radiometer sampling characteristics as closely as possible. The nadir footprint result is shown as an example, and represents the worst case for camera ADM sample coverage of the radiometer footprint. This is because both the radiometer footprint and camera pixels become stretched away from nadir due to the view projection and Earth curvature, but the camera has an additional distortion due to the fish-eye type lens that will result in increased coverage of the radiometer footprint in off-nadir view directions.</li> <li>• To clarify, we added “<i>at nadir</i>” on L191, and “<i>The camera ADM samples will therefore match the view-angle variation in Libera footprint size with increasing fidelity.</i>” on L198-199.</li> </ul>                                                                                                                                                                                                                                                                                                                                                                                                                                                                                                                                                                                                                                                                                                                                                                                                                                                                                                                                                                                                                                                                                                                                                                                                      |
| <p>Section 4</p> <p>I think I need a bit more convincing that the correlation across scenes optimizes within scene angular fidelity and more information to assess the likely accuracy and the derived ADMs and hence the flux determined using them.</p> <p>As the ADMs only need to provide information on the angular distribution of energy within each scene class and solar zenith angle, it is not obvious to me that correlation between the monochromatic and broadband radiances across these variables is important. Rather ADM accuracy would only seem to require good correspondence across angles within each scene and solar zenith class as the ADM data is averaged and normalised on a scene by scene basis. I wonder if trying to have good correlation across these additional variables to ensure you can perform a monochromatic to broadband VIS (or NIR) conversion with high fidelity is overly restrictive. In feel that the expanded dynamic range that results from combing scenes and/or solar zenith angles would likely dominate the correlation and hinder the search for the optimum wavelength for ADM derivation in favour of the optimum wavelength for overall broadband fidelity. For the restricted angular coverage data primarily used in this section (the nadir OSSE data and the near nadir SCIAMACHY observations and simulations) this across</p> | <ul style="list-style-type: none"> <li>• Please see the response to the question regarding Section 1 above, which we believe helps to address some of the points raised here also. The idea is to start with a monochromatic (555 nm in this case) angular distribution of energy that is very similar to the broadband channel of interest (VIS in this case). Since the 555 nm and VIS angular distributions will not be identical due to the inherently spectral nature of radiation interactions with Earth system properties, using the 555 nm angular variations as is could introduce a bias in the VIS radiance-to-irradiance conversion. It is therefore desirable to first convert the monochromatic radiances to broadband, as a function of solar-viewing geometry and scene. The purpose of Section 4 is to explore this scene and angular dependency, and shows that, for the selected wavelength of 555 nm, this conversion is straightforward across angles and scenes, and therefore minimizes the additional uncertainty introduced by the spectral conversion.</li> <li>• We feel that the reviewer’s comment that we used “<i>the across scene correlation at nadir and near nadir wavelength as the only basis on which to justify the optimum wavelength for capturing the broadband angular variation within scene classes</i>” does not fairly represent our study. We point the reviewer to L274-276 where we already acknowledged this point directly: “<i>It is necessary that the spectral relationships hold at nadir, but not sufficient; since a spectral conversion is desired for angular sampling, it is also important to confirm that these results hold at off-nadir view geometries</i>”. The SCIAMACHY (Fig. 5b) and AVIRIS (Fig. 6) observations each contain the full range of respective view geometries. The CERES unfiltering dataset (Fig. 8a-c) and libRadtran calculation (Fig. 8d) then explore the breakdown of the relationships directly by solar-viewing geometry. These results were a key factor in the identification of 555 nm as an ideal camera wavelength.</li> </ul> |

|                                                                                                                                                                                                                                                                                                                                                                                                                                                                                                                                                                                                                                                                                                                                                                                                                                                                                                                                                                                                                                                                                                                                                                                                                                                                                                                                                                                                                          |                                                                                                                                                                                                                                                                                                                                                                                                                                                                                                                                                                                                                                                                                                                                                                                                                                                                                                                                                                                                                                                                                                                                                                                                                                                                                                                                                                                                                                                                                                                                                                                                                                                                                                                                                                                                                                                                                                                                                                                                                                                                                                                                                                                                                                                                                                                                                                                                                                                                                                                                                                    |
|--------------------------------------------------------------------------------------------------------------------------------------------------------------------------------------------------------------------------------------------------------------------------------------------------------------------------------------------------------------------------------------------------------------------------------------------------------------------------------------------------------------------------------------------------------------------------------------------------------------------------------------------------------------------------------------------------------------------------------------------------------------------------------------------------------------------------------------------------------------------------------------------------------------------------------------------------------------------------------------------------------------------------------------------------------------------------------------------------------------------------------------------------------------------------------------------------------------------------------------------------------------------------------------------------------------------------------------------------------------------------------------------------------------------------|--------------------------------------------------------------------------------------------------------------------------------------------------------------------------------------------------------------------------------------------------------------------------------------------------------------------------------------------------------------------------------------------------------------------------------------------------------------------------------------------------------------------------------------------------------------------------------------------------------------------------------------------------------------------------------------------------------------------------------------------------------------------------------------------------------------------------------------------------------------------------------------------------------------------------------------------------------------------------------------------------------------------------------------------------------------------------------------------------------------------------------------------------------------------------------------------------------------------------------------------------------------------------------------------------------------------------------------------------------------------------------------------------------------------------------------------------------------------------------------------------------------------------------------------------------------------------------------------------------------------------------------------------------------------------------------------------------------------------------------------------------------------------------------------------------------------------------------------------------------------------------------------------------------------------------------------------------------------------------------------------------------------------------------------------------------------------------------------------------------------------------------------------------------------------------------------------------------------------------------------------------------------------------------------------------------------------------------------------------------------------------------------------------------------------------------------------------------------------------------------------------------------------------------------------------------------|
| <p>scene and solar zenith variation becomes the only variable of interest. Whilst some across scene variation effects would mimic angular variations others such as spectral variation in surface reflection are I think not so relevant. Thus, I think using the across scene correlation at nadir and near nadir wavelength as the only basis on which to justify the optimum wavelength for capturing the broadband angular variation within scene classes needs more support. The CERES unfiltering database scene specific correlations shown in figure 8 would need to be further stratified by solar zenith to provide this support I think. As currently presented the variation in incoming shortwave with solar zenith which isn't relevant for the ADMs becomes a factor dominating the correlations shown.</p> <p>It is also not obvious to me how the relationships shown in section 4 can be easily translated into an error in the ADM and hence the derived flux. Some exploration of this would be helpful and may identify some scenes or angles that are particularly problematic. Figure 8 (d) comes the closest to addressing this but as it shows reflectance and only explores a single viewing zenith can't be understood in terms of the likely flux error. What I would like to understand is the difference in the inferred anisotropy between a broadband and monochromatic derived ADM.</p> | <ul style="list-style-type: none"> <li>• It appears the reviewer might have missed one of our results when they ask for stratifying the CERES unfiltering database by SZA. That is precisely what is done in Fig. 8a. Perhaps the reviewer is suggesting to hold SZA fixed and look more closely at the VZA and RAA variations, and their correspondence between 555 nm and VIS. This is shown for an example in Figure 8d. Since the reviewer asked for some further exploration of this, we added Appendix A on L430-445, updated Table 1 accordingly, and added <i>“The correspondence between 555 nm and VIS also holds with varying SZA, VZA and cloud optical depth (see Appendix A).”</i> on L297-298 for this purpose. The new Appendix A includes some additional plots and related discussion, showing that the angular variation between 555 nm and VIS holds just as well, or better, across a range of SZA and VZA combinations, and varying cloud optical depth.</li> <li>• Note also that, while the consistency between 555 nm and VIS angular variations is preferred such that we start very close to the answer, it is not strictly necessary. What is more important is that any angular differences are rectified during the conversion to broadband. For example, it is possible that a worse starting correspondence between the angular variations of a monochromatic channel and VIS (or NIR) could result in an even better prediction of the VIS (or NIR) angular distribution given a near-perfect broadband conversion. This is why we place emphasis on the tight relationship between 555 nm and VIS across angles and scenes in this section. We hope this detailed explanation and theoretical example clarify to the reviewer the importance of the conversion to broadband. To avoid the possibility for misinterpretation, we added <i>“for a given solar-viewing geometry and scene, and subsequently be used for split-SW ADM generation”</i> on L212-213.</li> <li>• Full quantification of the associated error in ADMs and the derived flux would be a substantial additional effort and is not the target of this study. It would require the development and implementation of ADMs that apply the spectral conversion and other processing steps shown in Fig. 1, which none of the existing datasets are capable of. We agree that such an activity is important and is planned during the years leading up to the Libera mission, so we encourage the reviewer to stay tuned to the mission developments.</li> </ul> |
| <p>Section 5</p> <p>I'm not sure that the results in this section really answer the question of how long will be needed to build the required ADMs. Angular coverage that isn't stratified by solar zenith angle (figures 10 and 11) whilst likely a minimum requirement doesn't provide reassurance that the ADMs will be filled at the solar zenith angles of the scenes observed</p>                                                                                                                                                                                                                                                                                                                                                                                                                                                                                                                                                                                                                                                                                                                                                                                                                                                                                                                                                                                                                                  | <ul style="list-style-type: none"> <li>• The reviewer is correct that an answer of exactly how long is needed to derive ADMs with the Libera camera approach is not answered by this section. Equally, it is not our intention to provide an exact answer to this question. Rather, the intention here is to clearly demonstrate that it would be substantially quicker than alternative approaches (i.e., Libera radiometers in occasional RAPS mode).</li> <li>• Part of the reason that we do not target an exact time needed to generate ADMs is that we are using a single day of Cookie Dough data to provide a sense of the</li> </ul>                                                                                                                                                                                                                                                                                                                                                                                                                                                                                                                                                                                                                                                                                                                                                                                                                                                                                                                                                                                                                                                                                                                                                                                                                                                                                                                                                                                                                                                                                                                                                                                                                                                                                                                                                                                                                                                                                                                      |

by the VIS channel. In fact when the effect of of the sun synchronous orbit is considered on the pixel array angular sampling the mis-match between solar zenith for particular angular bins would seem inevitable. Perhaps I misunderstand but the reassurance that these figures give about the ability build up the ADMs is unclear to me. The solar zenith angle stratified results shown in figure 12 and that could be derived for other scenes, including those stratified by optical depth, also don't directly translate into incomplete ADMs for scenes that are actually required, as the orbital characteristics and illumination conditions for any particular time of year will restrict the solar zenith angle - scene combinations observed by the VIS channel. I feel that to understand how quickly the camera can build the required ADMs, the angular coverage needs to be stratified by solar zenith and scene (including cloud optical depth if this will be used for the ADMs ), but the resulting coverage needs to be considered in the context of the actual ADMs required at that point in the record. So, the question of how long it will take in practice to build the required ADMs with this technique is a question about how quickly good angular coverage can be obtained for the scenes viewed by the broad band instrument (in the centre of the pixel mask I assume), by the camera pixel array. I expect this can be answered with the data used here, and I wonder if this analysis would change the scenes considered difficult to acquire, the length of time needed or point to a need for a few days every month or season of monochromatic observations to keep up with the evolving make up of the observed scenes. Given the sun synchronous orbit and the effect this will have on the solar zenith sampling of the different camera pixels I also wonder if this analysis might impact the choice of optimum subsampling of the camera pixels. For the case of the random pixel mask, I also wonder if this study shows if random coverage of the ADM angular bins is achieved once the scene variation and orbit effects are superimposed.

anticipated sampling improvements. We repeated the simulations for 4 separate days spread across the annual cycle, but these are not consecutive days. To robustly answer this question, we believe that an extended set of continuous Cookie Dough data is required, perhaps a few months, or ideally a full year to capture the superimposed orbit and scene sampling that the reviewer mentions (see below). This would then enable calculation of cumulative synthetic camera sampling stratified by the full angular-scene space for ADM generation, which can then be compared with the ADMs that are required by the radiometer. This would also need to be coupled with a comprehensive ADM approach that establishes, for example, the number of samples required in each angular bin to determine a reliable average, how to fill missing angular bins that are inevitable, etc. While we are actively pursuing such an effort and recognize its value, we are simply not at that stage of development yet, and it follows that it is not the goal of the present study.

- The mis-match that the reviewer points out between SZAs viewed by the radiometer (cross-track directions only) and the camera (all observable directions) is true for a given scene and at a given time. However, this mis-match actually becomes an advantage for ADM generation because of how the observations are aggregated over time. For example, a desert scene viewed by the camera at a given SZA that is slightly different to what the radiometer can see at that time, will provide a useful observational constraint if the radiometer can view that desert scene at that SZA a month later. In addition, because of the binning into broader scene types during ADM generation, thinking about this in terms of the SZA and scene at a given location and time becomes less relevant. Returning to the example, a desert scene viewed by the camera at a given SZA that is different to what the radiometer can see at that time, could still provide a useful observational constraint for when the radiometer views a different desert scene at that SZA, given that both desert scenes belong to the same broader scene type. This situation could even occur during the same orbit. In short, the camera matches and then substantially expands the angular-scene combinations that are possible to encounter with the radiometer at a given time, leading to more complete ADMs that will be required for the radiometer at other times. That is the reassurance that these figures give.
- As suggested by the reviewer, after stratifying by solar zenith angle as is typically done in ADM generation, there are unavoidable sampling gaps due largely to the sun-synchronous orbit of the satellite. This is shown for a single day of sampling in Fig. 12. There is indeed a seasonal change in these sampling gaps when stratifying by SZA as the reviewer suggests. To provide a sense of how the angular sampling changes with season, we added Appendix B on L446-460, and replaced “(not shown) as Earth’s declination angle varies and therefore Earth’s surfaces are tilted either toward or away from the Sun”

with “(see Appendix B)” on L375. The new Appendix B includes some additional plots and related discussion, showing that the missing angular bins can shift depending on the season, and points out that combining observations across a full annual cycle would be ideal.

- The random pixel mask is designed to ensure even coverage of the VZA and RAA dimensions, but the SZA sampling is indeed largely dictated by the orbital characteristics as already mentioned above. Discussions of the reasons for this are given on L371-374. A more targeted approach to acquire ADM samples from the camera that are evenly distributed across SZA could be considered, but may not be desirable since we seek better statistics for the SZA-scene combinations that are encountered most often with the radiometer. It follows that we do not need to be overly concerned about SZA-scene sampling gaps from the camera if the radiometer does not encounter these combinations either, since those ADMs will never be required. A key point is that the observable SZA-scene combinations from the radiometer are a subset of those from the camera, which ensures that the camera ADM samples capture the relevant combinations as a minimum. We thank the reviewer for bringing this point to our attention and we added the following text on L377-382: *“It should be noted that, since these sampling gaps are related to the orbital characteristics, they are not unique to the camera approach presented here; similar sampling gaps can be expected with the traditional radiometer RAPS approach. In fact, the sampling is in a sense self-balanced, in that the superimposed SZA and scene statistics built up from camera sampling for ADM generation encounter a similar frequency of occurrence to the radiometer that will use these ADMs, given that they are flying on the same platform and that the radiometer cross-track scan always falls within camera field-of-view.”*

# Angular Sampling of a Monochromatic, Wide-Field-of-View Camera to Augment Next-Generation Earth Radiation Budget Satellite Observations

Jake J. Gristey<sup>1,2,3</sup>, K. Sebastian Schmidt<sup>3,4</sup>, Hong Chen<sup>3</sup>, Daniel R. Feldman<sup>5</sup>, Bruce C. Kindel<sup>3</sup>, Joshua  
5 Mauss<sup>3,4</sup>, Mathew van den Heever<sup>3,4</sup>, Maria Z. Hakuba<sup>6</sup>, Peter Pilewskie<sup>3</sup>

<sup>1</sup>Cooperative Institute for Research in Environmental Sciences, University of Colorado, Boulder, CO, USA

<sup>2</sup>NOAA Chemical Sciences Laboratory, Boulder, CO, USA

<sup>3</sup>Laboratory for Atmospheric and Space Physics, University of Colorado, Boulder, CO, USA

<sup>4</sup>Department of Atmospheric and Oceanic Sciences, University of Colorado, Boulder, CO, USA

10 <sup>5</sup>Earth and Environmental Sciences Area, Lawrence Berkeley National Laboratory, Berkeley, CA, USA

<sup>6</sup>NASA Jet Propulsion Laboratory, California Institute of Technology, Pasadena, CA, USA

*Correspondence to:* Jake J. Gristey (Jake.J.Gristey@noaa.gov)

**Abstract.** Earth radiation budget (ERB) satellite observations require conversion of the measured radiance, which is a  
remotely-sensed quantity, to a derived irradiance, which is the relevant energy balance quantity routinely used in modelling  
15 and analysis of the climate system. The state-of-the-art approach for radiance-to-irradiance conversion taken by the Clouds  
and the Earth's Radiant Energy System (CERES) benefits from the exhaustive sampling of radiance anisotropy by multiple  
CERES instruments across many years. Unfortunately, the CERES approach is not easily extended to new ERB spectral  
channels that lack previous sampling, such as the “split-shortwave” planned to be part of the next-generation ERB mission  
Libera. As an alternative approach, the capability of a monochromatic, wide-field-of-view camera to provide dense angular  
20 sampling in a much shorter timeframe is assessed. We present a general concept for how this can be achieved and quantify  
the proficiency of a camera to provide rapid angular distribution model (ADM) generation for the new Libera ultraviolet-  
and-visible (VIS) sub-band. A single mid-visible camera wavelength (555 nm) is shown to be ideal for representing the VIS  
sub-band, requiring only basic scene stratification for 555 nm to VIS conversion. Synthetic camera sampling with realistic  
operating constraints also demonstrates that the angular radiance field of various scenes can be well populated within a  
25 single day of sampling, a notable advance over existing approaches. These results provide a path for generating  
observationally-based VIS ADMs with minimal lag time following Libera’s launch. Coupled with efforts to utilize a camera  
for scene identification, this may also pave the way for future ERB satellite systems to develop stand-alone irradiance  
products for arbitrary sets of spectral channels, opening up new measurement and science possibilities.

## 1 Introduction

30 Satellite observations of the Earth Radiation Budget (ERB) are essential for monitoring Earth’s climate because they  
track the amount of energy available to the Earth system. Consequently, they have been a mainstay from the dawn of the

satellite era through to the present day (Harries et al., 2005; Kandel et al., 1998; Wielicki et al., 1996; Kyle et al., 1993; Barkstrom, 1984; Jacobowitz et al., 1984; Raschke et al., 1973; Vonder Haar and Suomi, 1971; Raschke and Bandeen, 1970). A persistent challenge associated with ERB observations is the conversion of the measured radiance – a quantity  
35 dependant on the angle at which a scene is viewed, to a derived irradiance – a quantity that encompasses all view angles. This radiance-to-irradiance conversion is particularly crucial in the shortwave (SW) where strong anisotropy is common, resulting from the surface bi-directional reflectance and the optical properties of the atmosphere including those of absorbing gases, particles, and condensates. The irradiance is far more relevant for Earth system energetics, and therefore it is the derived irradiance products, rather than the direct radiance observations, that are most useful to quantify climate forcing and  
40 feedbacks (e.g., Ceppi and Nowack, 2021; Cesana and del Genio, 2021; Kramer et al., 2021; Myers et al., 2021; Raghuraman et al., 2021), constrain and improve climate models (e.g., Hartmann and Ceppi, 2014; Tett et al., 2013b, a; Forster and Gregory, 2006), and inform ERB assessments and scientific understanding (Loeb and Wielicki, 2015; Wild et al., 2015; Stephens et al., 2012; Trenberth, 2009; Vonder Haar and Suomi, 1971).

The solution to the radiance-to-irradiance conversion challenge is provided by so-called angular distribution models  
45 (ADMs). These models consist of a set of anisotropic factors,  $R$ , to convert the satellite-measured radiance,  $I$ , to an irradiance  $F$ :

$$F_{s,i} = \frac{\pi I_{s,i,j,k}}{R_{s,i,j,k}}, \quad (1)$$

where the subscript  $s$  represents the dependence on scene composition, and the subscripts  $i, j, k$  represent the angular dependences on solar zenith angle (SZA), viewing zenith angle (VZA), and relative azimuth angle (RAA), respectively. A  
50 full derivation of SW ADMs and discussion of their intricacies was recently outlined in a review article (Gristey et al., 2021). Here, it suffices to recognize that while the perfect ADM would require perfect knowledge of the properties of a given scene, ADMs are often parameterized into discrete scene types and solar-viewing geometries, and that these dimensions are highly stratified in current ERB products from the Clouds and the Earth's Radiant Energy System (CERES) (Su et al., 2015a; Loeb et al., 2005, 2003a). It has been shown that the higher stratification in CERES SW ADMs leads to  
55 reduced uncertainty in irradiance products at local and regional scales (Su et al., 2015b; Loeb et al., 2007, 2003b). This approach is made possible by both the retrieval of detailed scene properties using co-flying imager observations and direct sampling of radiance anisotropy accumulated over many years from multiple CERES instruments. The direct sampling of SW radiance anisotropy has largely been achieved through the operation of CERES instruments in rotating azimuth plane scan (RAPS) mode, where the instrument scans in elevation as it rotates in azimuth.

60 NASA's next-generation ERB satellite mission Libera, which is supported as the first Earth Venture Continuity mission and is due to launch in 2027, will provide continuity to the CERES data record. In addition to hosting heritage spectral channels for continuity, Libera will also host a "split-SW" radiometer to derive separately ultraviolet-to-visible (VIS; 0.3–0.7  $\mu\text{m}$ ) and near-infrared (NIR; 0.7–5.0  $\mu\text{m}$ ) sub-band irradiances. While detailed spectral information is typically needed to retrieve specific atmospheric properties (e.g., to separate between water vapor and cloud absorptions), the split-SW will



65 bring new science advances by probing how SW energy is partitioned at the surface and in the atmosphere (Hakuba et al.,  
2022; Carlson et al., 2019; Collins et al., 2006). However, there exists two challenges with applying the state-of-the-art  
CERES approach for radiance-to-irradiance conversion of Libera split-SW observations. First, the existing CERES SW  
ADMs cannot be directly applied because the surface and atmospheric absorption, reflection, and scattering differ markedly  
70 not yet exist. While Libera will have the capability to operate in RAPS mode and will co-fly with the Visible Infrared  
Imaging Radiometer Suite (VIIRS), it is expected to operate primarily in cross-track scan mode to meet continuity  
requirements; RAPS mode is only anticipated to be available for 12–36 days per year, and will be limited to a finite number  
of RAPS scans that is expected to be substantially less than the CERES instruments. Implementing highly stratified ADMs  
for the new split-SW sub-bands following the CERES SW ADM approach is therefore simply not feasible, especially since  
75 the development of VIS and NIR irradiance products cannot wait for years to exhaustively sample radiance anisotropy with  
Libera in RAPS mode.

To address the absence of sufficient angular sampling in the split-SW sub-bands, Libera plans to fly a monochromatic  
wide-field-of-view (WFOV) camera as part of its instrument package. The camera will continuously take images of the  
entire Earth disk from horizon-to-horizon with sub-kilometre pixel spacing at nadir, providing dense angular sampling of the  
80 radiance field. Uniformity in the camera pixel radiances across the WFOV, expected to be within 1.5% for the Libera  
camera, will be essential to derive anisotropic factors as in Equation 1. However, the camera radiances are not bound by  
similarly stringent requirements on absolute accuracy, expected to be within 5%, because the anisotropic factors are  
calculated as a ratio of radiances in different directions, making a camera appropriate for this task. A camera also provides  
several other potentially useful sampling opportunities for ERB, such as continuous imaging of the radiometer footprint for  
85 rudimentary scene identification, multi-angle views to aid cloud detection and cloud tomography retrieval, and detailed  
angular radiance variations of a given scene for ADM validation. While the exact specifications of the Libera camera are  
being actively refined and will be documented in a separate technical paper, we apply several aspects of the expected  
performance of the Libera camera as realistic constraints during this study.

The purpose of this study is to outline the concept and quantify the capability of a monochromatic WFOV camera to  
90 produce VIS ADMs. We focus on the VIS sub-band for reasons outlined in Section 4, but note that the NIR irradiance can  
subsequently be determined via subtraction of the derived VIS irradiance from the total SW irradiance. An overview of the  
process is shown in the flow diagram in Figure 1 and proceeds as follows. First, since anticipated data rate constraints dictate  
that entire camera images are unlikely to be downlinked during the Libera mission, we develop pixel masks that extract a  
small subset of camera image pixels to meet ADM development needs. Section 3 outlines the choice of pixel masks to  
95 provide monochromatic radiances at the radiometer footprint scale across a wide range of viewing angles. One can  
reasonably question how *monochromatic* (single channel) camera observations translate to *VIS* ADMs, and in Section 4 we  
show that a mid-visible wavelength provides a very tight relationship with the VIS sub-band requiring only minimal  
stratification by solar-viewing geometry and scene, thereby enabling a spectral conversion that is required to use

monochromatic observations to generate VIS ADMs. In Section 5, we quantify the capability of the camera to provide dense  
 100 angular sampling needed for ADMs by simulating synthetic camera samples and determining how they would populate the  
 angular space of various scene types.

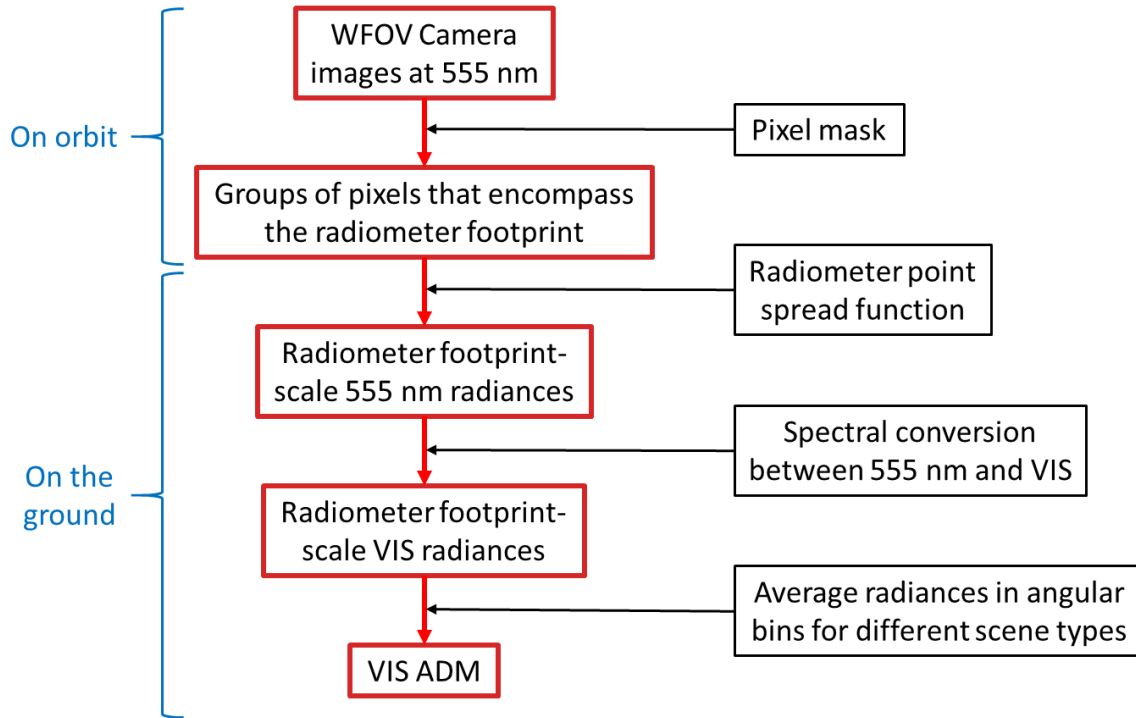

**Figure 1.** Flow diagram providing a broad overview of the processing steps required to go from WFOV camera images at a single mid-visible wavelength to a VIS sub-band ADM.

## 105 2 Data

To assess the spectral relationship between a monochromatic camera wavelength and the split-SW bands (Section 4) we  
 employ multiple datasets. First and primarily, we assess spectral relationships with the Climate Absolute Radiance and  
 Refractivity Observatory (CLARREO; Wielicki et al., 2013) observing system simulation experiment (OSSE; Feldman et al.,  
 2015, 2011a, b). The CLARREO OSSE is based on radiative transfer calculations using the MODerate resolution  
 110 atmospheric TRANsmission (MODTRAN; Berk et al., 2014) computer code with input atmospheric profiles from climate  
 models, providing a global perspective. Here, we use top-of-atmosphere (TOA) outgoing SW spectral radiances obtained  
 with profiles from the Commonwealth Scientific and Industrial Research Organisation (CSIRO) climate model output. There  
 exist a couple of important limitations of the CLARREO OSSE in the context of the present study including limited spectral  
 and angular resolution in the input surface spectral Bidirectional Reflectance Distribution Function (BRDF), and the fact that

115 the spectral radiances are only output at nadir. These limitations are addressed with additional observations and simulations, summarized together with all other datasets used in this study in Table 1.

For an observational perspective, we compare the CLARREO OSSE with satellite observations from the Scanning Imaging Absorption Spectrometer for Atmospheric Chartography (SCIAMACHY; Gottwald and Bovensmann, 2011) and aircraft observations from the Airborne Visible Infrared Imaging Spectrometer (AVIRIS; Green et al., 1998). Since the  
120 SCIAMACHY data volume is large, and extensive SCIAMACHY observations are not required for this study, we arbitrarily use data from 1<sup>st</sup> August 2004. We also use “SCIAMACHY-like” simulations over West Africa in 2010 (Gristey and Chiu, 2022; Gristey et al., 2019) that were generated via the Havemann-Taylor Fast Radiative Transfer Code (HT-FRTC; Havemann et al., 2018). A distinct observational perspective is provided by AVIRIS, where we select just four scenes that are frequently encountered across the globe. While limited in global representativeness, these AVIRIS scenes provide a  
125 valuable consistency check against the CLARREO OSSE, and have some advantages over SCIAMACHY such as covering a larger fraction of the incoming solar spectrum with much finer spatial resolution enabling better physical interpretation.

To provide some initial insights into the solar-viewing geometry dependence of spectral relationships, we also analyze a dataset of MODTRAN calculations that was used for CERES radiance unfiltering (Loeb et al., 2001). This dataset includes almost 5000 TOA spectral radiances at SZAs, VZAs, and RAAs that are most-often varied simultaneously from one  
130 calculation to the next. Since the angular resolution of this CERES unfiltering dataset is still relatively coarse, we further explore detailed angular variations for a given scene by running radiative transfer calculations with libRadtran (Emde et al., 2016; Mayer and Kylling, 2005) using a wrapper code included within the Education and Research 3D Radiative Transfer Toolbox (EaR<sup>3</sup>T; Chen et al., 2022). This diverse set of radiative transfer calculations and observations helps ensure that our analyses are minimally susceptible to radiative transfer model errors and existing observational limitations.

To assess the angular sampling of various scene types that a WFOV camera could observe (Section 5), we use an intermediate dataset that is applied in the production of CERES Single Scanner Footprint (SSF) data products (Loeb et al., 2003a) called “Cookie Dough”. This dataset contains a swath of retrieved geophysical variables (Minnis et al., 2021; Trepte et al., 2019) along the orbit and at the spatial resolution of the spectral imager that is co-flying on the same satellite as a given CERES instrument. In CERES processing, CERES radiometer footprints are then matched to this dataset and applied  
140 as a “cookie cutter” to extract the footprint scene properties, hence the colloquial analogy. Specifically, we use Cookie Dough derived from the VIIRS imager on the NOAA-20 satellite for 4 days spread evenly throughout an annual cycle. While a large number of retrieved geophysical variables are available in the dataset, we only extract those that are of most importance for exploring the scene stratification of VIS ADMs: surface type, cloud fraction, and cloud optical depth.

**Table 1. Datasets used in this study. Unless otherwise stated, no sub-setting of scene properties is applied.**

| Name         | Key characteristics for this study                                                                                                                                                                                                                             | Reference(s)                     |
|--------------|----------------------------------------------------------------------------------------------------------------------------------------------------------------------------------------------------------------------------------------------------------------|----------------------------------|
| CLARREO OSSE | <ul style="list-style-type: none"><li>• Based on radiative transfer with MODTRAN version 5.3.1</li><li>• Input profiles from CSIRO climate model output arbitrarily for January 2040 run under the representative concentration pathway 8.5 scenario</li></ul> | (Feldman et al., 2015, 2011a, b) |

|                               |                                                                                                                                                                                                                                                                                                                                                                                                                                                                                                                                                                        |                                                                 |
|-------------------------------|------------------------------------------------------------------------------------------------------------------------------------------------------------------------------------------------------------------------------------------------------------------------------------------------------------------------------------------------------------------------------------------------------------------------------------------------------------------------------------------------------------------------------------------------------------------------|-----------------------------------------------------------------|
|                               | <ul style="list-style-type: none"> <li>• Data on a global grid with 96 latitude <math>\times</math> 192 longitude points</li> <li>• Output is TOA nadir radiance at 5 nm spectral resolution</li> </ul>                                                                                                                                                                                                                                                                                                                                                                |                                                                 |
| SCIAMACHY observations        | <ul style="list-style-type: none"> <li>• SW hyperspectral imaging spectrometer that flew on the European Space Agency’s Environmental Satellite from 2002–2012</li> <li>• Reflected solar spectrum from 240–1750 nm, version 8.</li> <li>• Spectral resolution between 0.22 and 1.48 nm depending on spectral region</li> <li>• Data extracted for 1<sup>st</sup> August 2004, consisting of 24,971 spectra</li> </ul>                                                                                                                                                 | (Gottwald and Bovensmann, 2011)                                 |
| SCIAMACHY-like simulations    | <ul style="list-style-type: none"> <li>• Based on radiative transfer with HT-FRTC</li> <li>• 90,917 input profiles derived from A-Train satellite retrievals in 2010</li> <li>• West Africa only (20°W–20°E and 0°–30°N)</li> <li>• TOA nadir radiance at native SCIAMACHY spectral resolution</li> </ul>                                                                                                                                                                                                                                                              | (Gristey and Chiu, 2022; Gristey et al., 2019)                  |
| AVIRIS observations           | <ul style="list-style-type: none"> <li>• Downward-pointing SW hyperspectral imaging spectrometer flown on the ER-2 aircraft at approximately 20 km altitude</li> <li>• Reflected solar spectrum from 366–2500 nm</li> <li>• Spectral resolution of 10 nm</li> <li>• Data extracted for 4 arbitrary scenes: marine cirrus, marine stratus, cropland, and mixed forest/cumulus clouds.</li> </ul>                                                                                                                                                                        | (Green et al., 1998)                                            |
| CERES unfiltering simulations | <ul style="list-style-type: none"> <li>• Based on radiative transfer with MODTRAN version 3.7</li> <li>• A total of 4956 simulations categorized as land (2520), cloudy ocean (336), clear ocean (588), deep convective cloud (252), and snow (1260), which excludes the highest SZA bin from (Loeb et al., 2001)</li> <li>• Output is TOA radiance at a spectral resolution of 20 <math>\text{cm}^{-1}</math> in intervals of 10 <math>\text{cm}^{-1}</math></li> <li>• SZA, VZA, and RAA most-often varied simultaneously from one simulation to the next</li> </ul> | (Loeb et al., 2001)                                             |
| libRadtran simulations        | <ul style="list-style-type: none"> <li>• <del>Single scene: e</del>Cloud from 0.5–1 km with optical depths of 10, <u>20, and 50</u>, effective radius of 12 microns, and a Lambertian ocean surface with albedo of 0.03</li> <li>• <del>Fixed SZAs</del> of <u>30° and 60°</u></li> <li>• <del>Fixed VZAs</del> of <u>10°, 30°, 45°, and 50°</u></li> <li>• <del>Variable RAAs</del> from 0–360° every 5°</li> </ul>                                                                                                                                                   | (Chen et al., 2022; Emde et al., 2016; Mayer and Kylling, 2005) |
| CERES Cookie Dough            | <ul style="list-style-type: none"> <li>• Retrievals from VIIRS on NOAA 20</li> <li>• Data from 1<sup>st</sup> January, 1<sup>st</sup> April, 1<sup>st</sup> July, and 1<sup>st</sup> October 2021</li> <li>• Retrieved variables: surface type, cloud fraction, cloud optical depth</li> <li>• Sub-setting is applied in the Cookie Dough processing by using every eighth VIIRS imager pixel and every other scan line</li> </ul>                                                                                                                                     | (Minnis et al., 2021; Trepte et al., 2019)                      |

### 145 3 Sub-setting of camera images for dense angular sampling

Continuously capturing high-resolution images of the entire Earth disk viewable from satellite altitude creates significant demands on satellite data storage and downlink. For example, the 2048  $\times$  2048 12-bit camera images anticipated every 5 seconds during the Libera mission, shown schematically in Figure 2, equates to a data rate greater than 10,000 kbit/s, which is orders of magnitude larger than the allocation when Libera was proposed. To address this challenge, we recognize that

150 entire images are not necessarily required to meet angular sampling needs for ADM generation. Instead, it is possible to

extract a small subset of the overall pixels in each image that encompass a variety of viewing geometries, and only save/downlink those pixels. These subsets of pixels can be selected by carefully designing and applying pre-designed pixel masks to camera images.

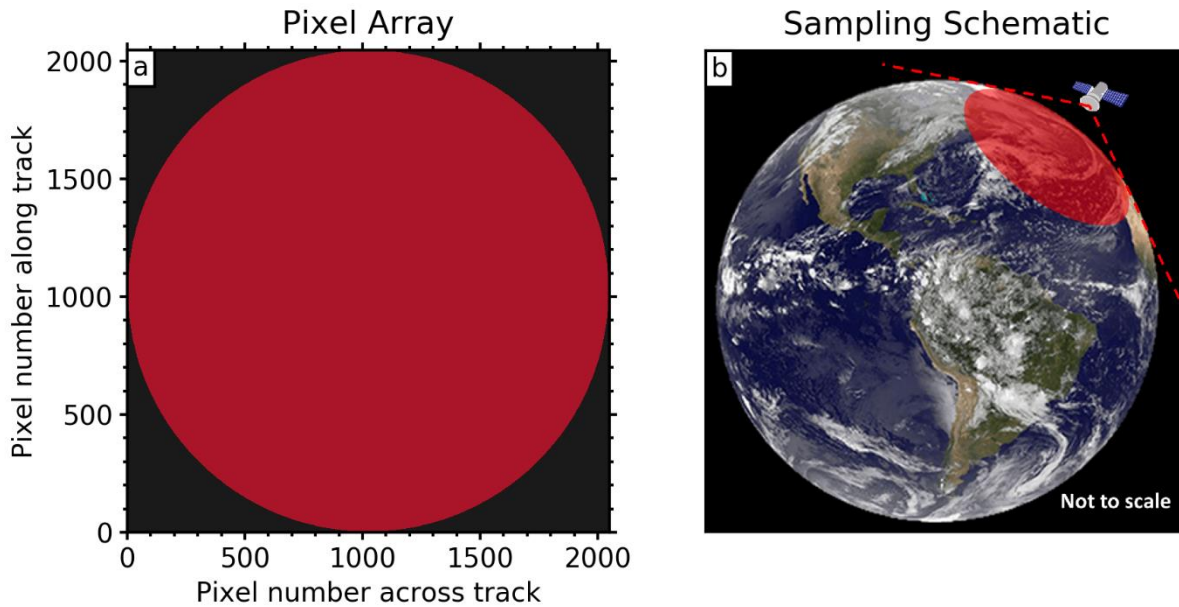

155 **Figure 2. (a) A  $2048 \times 2048$  camera pixel array providing 750 m resolution at nadir (red pixels are viewing Earth while black pixels fall beyond the horizon) and (b) an instantaneous sampling schematic of a WFOV camera viewing Earth (footprint in red shading). This design is broadly consistent with the camera proposed to fly as part of the Libera instrument package at an estimated altitude of 824 km. (Earth image credit: NASA).**

To ensure a pixel mask provides dense angular sampling needed for ADM generation, we structure it around the angular  
 160 bins applied for SW ADMs from the CERES instrument on the Tropical Rainfall Measuring Mission (TRMM) (henceforth  
 “CERES-TRMM”; Loeb et al., 2003a). These consist of SZA and VZA bins with  $10^\circ$  width and RAA bins with  $20^\circ$  width.  
 While other angular bin definitions could be considered, sampling each of these angular bins at each camera exposure  
 provides a reasonable balance of dense angular sampling while drastically decreasing data rate. The sampling can also be  
 scaled as needed (see below), so the approach is largely insensitive to the initial angular bins used as a reference.

165 We propose a nominal sampling pattern that consists of separate groups of pixels (henceforth “ADM samples”) at the  
 center of every CERES-TRMM angular bin for each camera exposure (Figure 3a and b). In this case, only 79,218/4,194,304  
 (1.89%) of the pixels in each image are extracted. One implication of this fixed nominal pixel mask is that identical VZAs  
 are sampled from one camera exposure to the next. Since the angular distribution of reflected solar radiation can be non-  
 linear within angular bins, samples taken at the center of an angular bin may not be representative of that angular bin as a  
 170 whole. To address this issue, the location of the ADM sample can be randomized within each angular bin on orbit (e.g.,  
 Figure 3c and d). Randomization can be implemented from one camera exposure to the next, or updated periodically, so long  
 as the net result does not lead to sampling bias within angular bins. Note that the geolocated ADM samples (e.g., Figure 3b

175 and d) experience significant stretching with increasing VZA resulting from a combination of three factors: the view angle projection onto a flat surface, the additional curvature of the Earth, and a further additional distortion from the “fish-eye” camera lens.

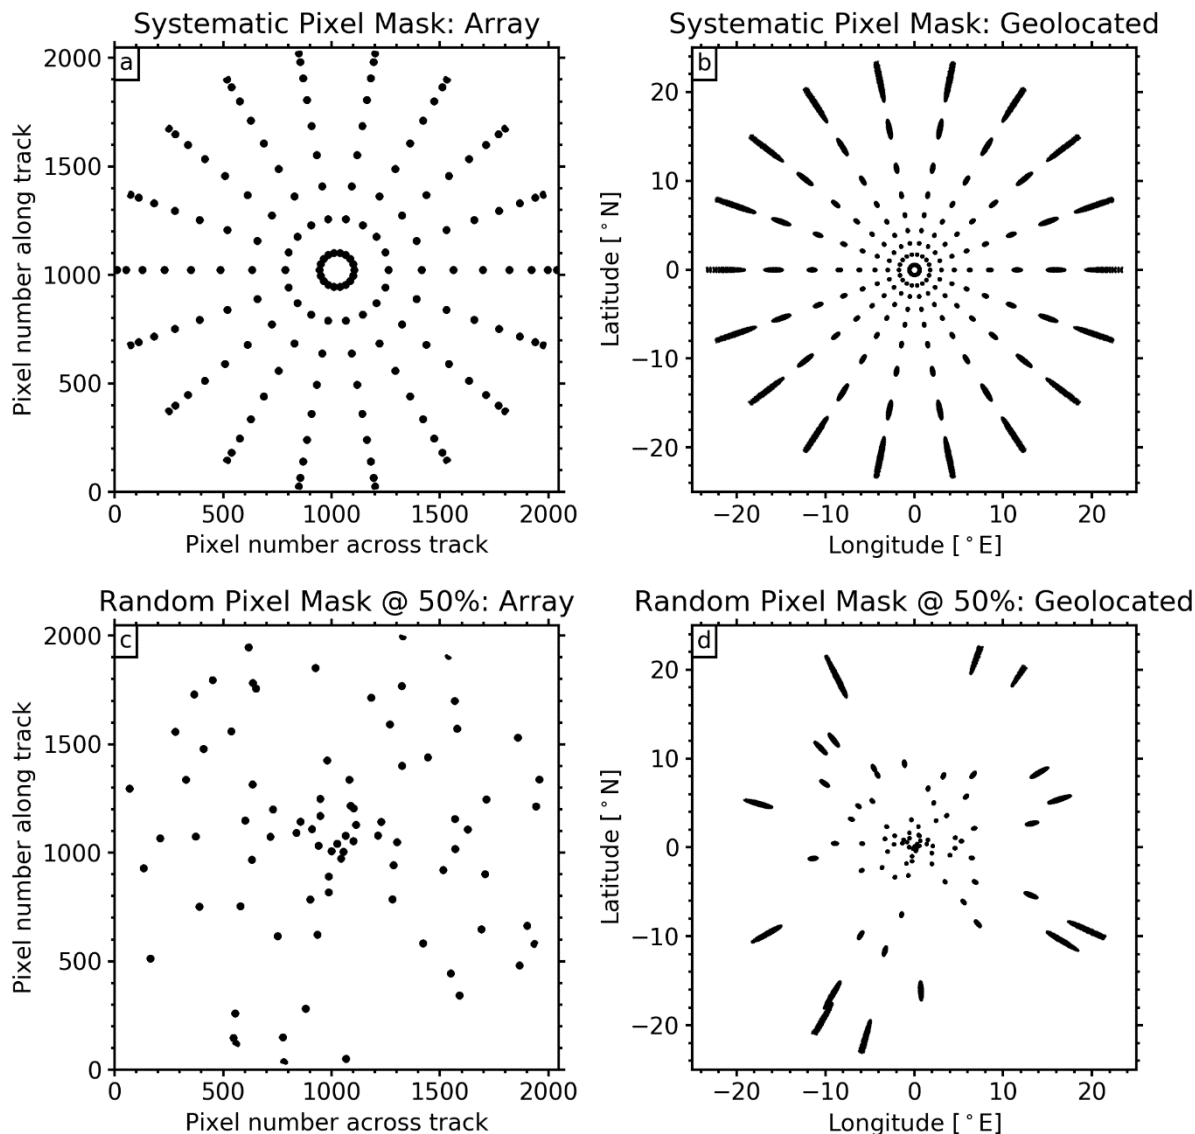

180 **Figure 3. Preliminary camera pixel masks to provide dense angular sampling while limiting downlink data rate. A systematic camera pixel mask (a and b) consists of groups of pixels (“ADM samples”) at the centre of each CERES-TRMM angular bin, while a randomized camera pixel mask with a scaling factor of 50% (c and d) consists of half of the total number of ADM samples randomly located across and within CERES-TRMM angular bins. Data are plotted in two coordinate systems: the camera pixel array (a and c) and geo-located nominally at the equator and prime meridian (b and d). Note that pixels within an ADM sample that fall beyond the horizon are not shown.**

Given that it is not strictly necessary to sample every VZA and RAA bin per camera exposure to generate ADMs, an important flexibility of this pixel mask is the ability to implement a scaling factor to adjust the number of ADM samples for each camera exposure. This enables tailoring to a given bandwidth/data rate. For the example given in Figure 3c and d, a scaling factor of 50% is applied, leading to a pixel mask where only 50% of the angular bins contain an ADM sample at each camera exposure, equivalent to only 39,609/4,194,304 (0.94%) of the pixels in each image. The selection of which angular bins are sampled can also be randomized to avoid sampling biases over an extended time period. A 50% scaling factor with randomization from one exposure to the next is applied in the simulation experiments in Section 5.

Each ADM sample within a pixel mask contains almost 500 pixels that are selected to encompass the radiometer footprint of approximately 20 km in diameter at nadir. Camera pixel-level radiances can then be weighted by the radiometer point spread function (PSF). The purpose of this is to ensure that the spatial resolution of the sampling is consistent for the radiances that are used to generate ADMs, and the radiances that will utilize ADMs which will come from the split-SW radiometer. When comparing to the actual PSF of the CERES radiometer that is planned to be identical for Libera (Figure 4), it is clear that some non-negligible contributions to the equivalent radiometer measurement would originate outside the ADM sample. The size of the ADM sample can easily be increased as needed and should not influence the results of this study, but note that this situation at nadir represents a worst-case scenario since the actual coverage of the radiometer PSF increases with VZA due to the additional camera lens distortion not experienced by the radiometers. The camera ADM samples will therefore match the view-angle variation in Libera footprint size with increasing fidelity.

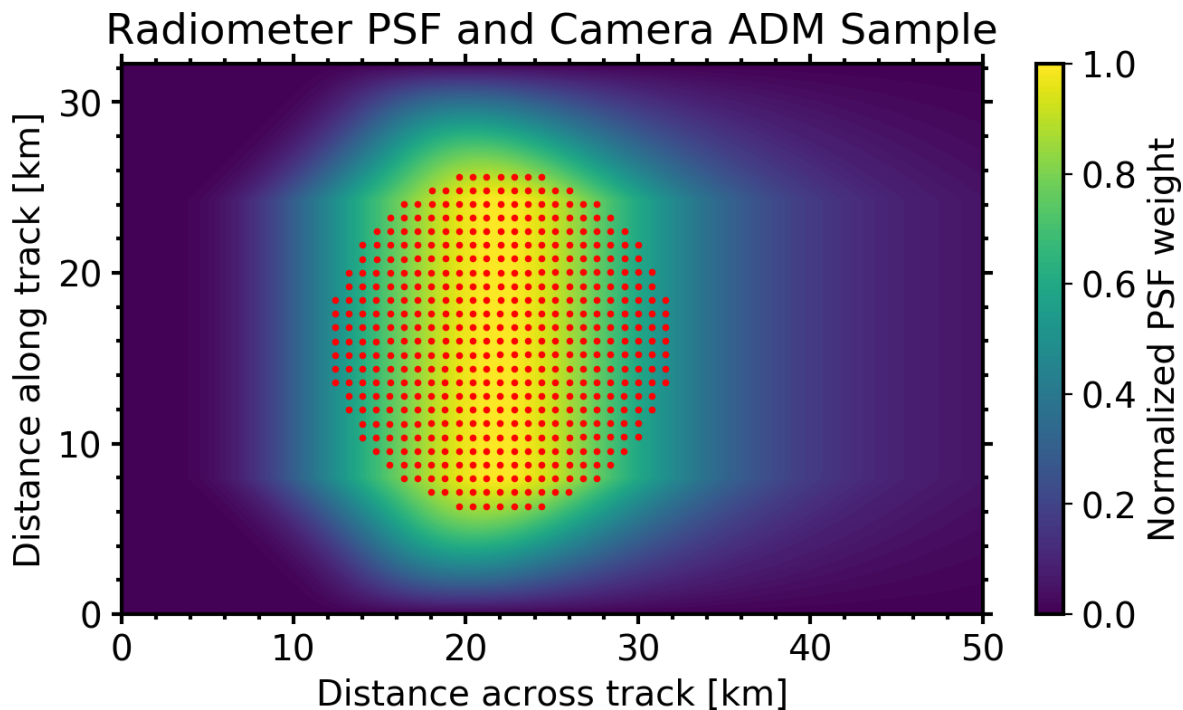

200

**Figure 4. Near-nadir comparison between the CERES (and expected Libera) point spread function (PSF) normalized to a maximum value of 1 (background contours) and the individual pixels constituting an ADM sample from the WFOV camera (red dots).**

#### **4 Choice of camera wavelength**

205 Application of monochromatic angular radiances to generate broadband ADMs is inspired partly by Corbett and Su (2015) who found that, of the Multi-angle Imaging SpectroRadiometer (MISR; Diner et al., 1998) spectral channels, the 865 nm channel correlates best with the CERES total SW, and subsequently incorporated radiances from this MISR channel to create CERES SW ADMs over Antarctic sastrugi. To determine the applicability of a similar spectral conversion to aid the generation of split-SW ADMs, we examine a variety of independent datasets containing spectrally-resolved reflected SW  
210 radiances. For a given wavelength to act as a good proxy for one of the split-SW sub-bands, a very high correlation between them should exist. That way, the measured radiance in the monochromatic channel can serve as a predictor for radiance across the spectral channel of interest for a given solar-viewing geometry and scene, and subsequently be used for split-SW ADM generation. Note that this implies a conversion from monochromatic radiances to broad-band radiances to inform broad-band ADMs, and therefore does not directly concern monochromatic ADMs.

215 The CLARREO OSSE that includes scenes across the entire globe (Figure 5a) suggests that, while 865 nm is amongst the highest correlations for the NIR sub-band, it is not an optimal proxy for either of the split-SW bands. The primary reasons for this lower correlation are that water vapor, liquid, and ice absorption, and surface bi-directional reflectance, all affect the NIR sub-band strongly, vary significantly across scene type, and produce spectrally-varying impacts across the NIR sub-band (discussed further below; see Figure 7). Instead, we find that the highest correlation occurs between mid-visible  
220 wavelengths and the VIS sub-band, where absorption is minimal and surface bi-directional reflectance has less spectral dependence. These high VIS sub-band correlations are broadly consistent with results from SCIAMACHY observations and SCIAMACHY-like simulations (Figure 5b). Some differences are expected given that the CLARREO OSSE is based on global gridded data, while the SCIAMACHY observations are only extracted for a single day exhibiting denser sampling in polar regions, and the SCIAMACHY-like simulations are for an entire year but only over a limited region (see details in  
225 Section 2). Despite the different characteristics of the datasets, the consistently high correlation at mid-visible wavelengths provides reassurance that the result is robust. Although a range of mid-visible wavelengths exists where similarly high correlations occur, we proceed specifically with 555 nm because it is expected to have several operational advantages for the Libera mission. These include matching the VIIRS M4 band due to co-fly with Libera that will be useful for consistency checks and flat-fielding activities (not discussed here), and 555 nm is at the longer-wavelength end of the highest  
230 correlations, which is important to minimize on-orbit optical degradation that occurs preferentially at shorter wavelengths (Béland et al., 2014).



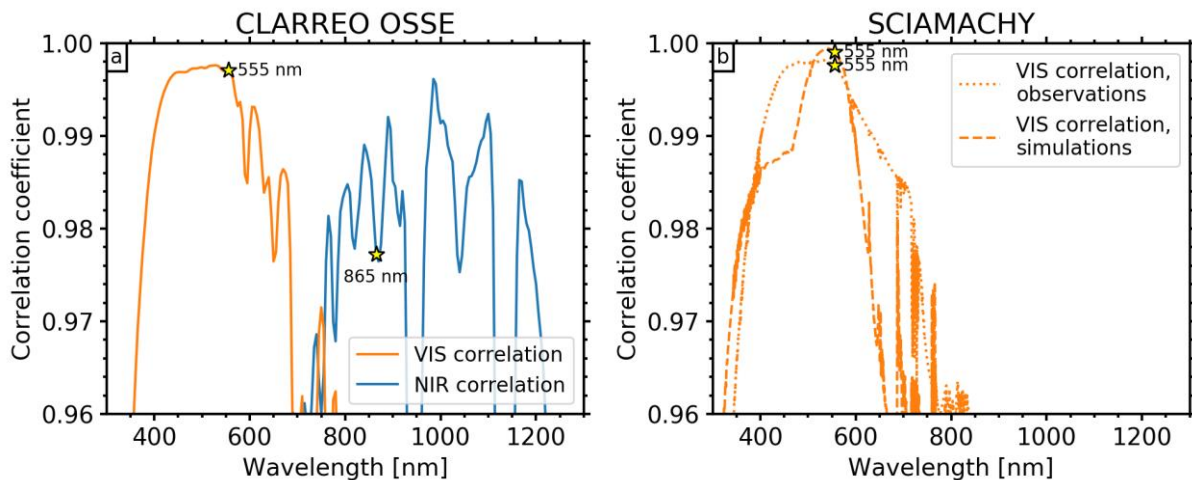

235 **Figure 5. Pearson correlation coefficient between TOA spectral radiances and the VIS (orange) and NIR (blue) sub-band radiances for (a) all scenes in the CLARREO OSSE and (b) SCIAMACHY observations and SCIAMACHY-like simulations. Star symbols highlight the wavelengths of focus: 555 nm and 865 nm. Correlations extend beyond the given vertical axis range, but only the highest correlations are shown. Note that the NIR sub-band correlation is not shown for SCIAMACHY because of spectrally-incomplete data in the NIR.**

As an additional test of the spectral relationships determined from the CLARREO OSSE and SCIAMACHY data (Figure 5), selected AVIRIS scenes are examined (Figure 6), this time with the full dynamic range of correlations retained to reveal the spectral character of the individual scenes. The AVIRIS correlation spectra largely tell the same story; mid-visible wavelengths consistently exhibit the highest correlation with the VIS sub-band. The NIR sub-band correlation, however, varies substantially more between these scenes for any given wavelength. When clouds dominate the scene (Figure 6a and b), the VIS and NIR sub-band correlations are themselves correlated given the generally high reflectance of clouds throughout the spectrum. In contrast, when vegetation dominates the scene (Figure 6c and d), the VIS and NIR correlations are themselves anti-correlated, with a sharp transition at the so-called near-infrared edge where vegetation is typically dark in the visible and becomes much brighter in the NIR. For the cloud-free agriculture scene (Figure 6c), there is even a negative correlation between the VIS sub-band and NIR wavelengths from around 700–1200 nm. The correlation spectra closely mimic (or are the inverse of) typical surface or cloud reflectance spectra, demonstrating the dominance of the underlying surface or cloud spectral reflectance for the VIS or NIR sub-band correlation. Regardless of these spectral details, 555 nm maintains a very high correlation with the VIS sub-band across all scenes, around 0.99 or greater.

240

245

250

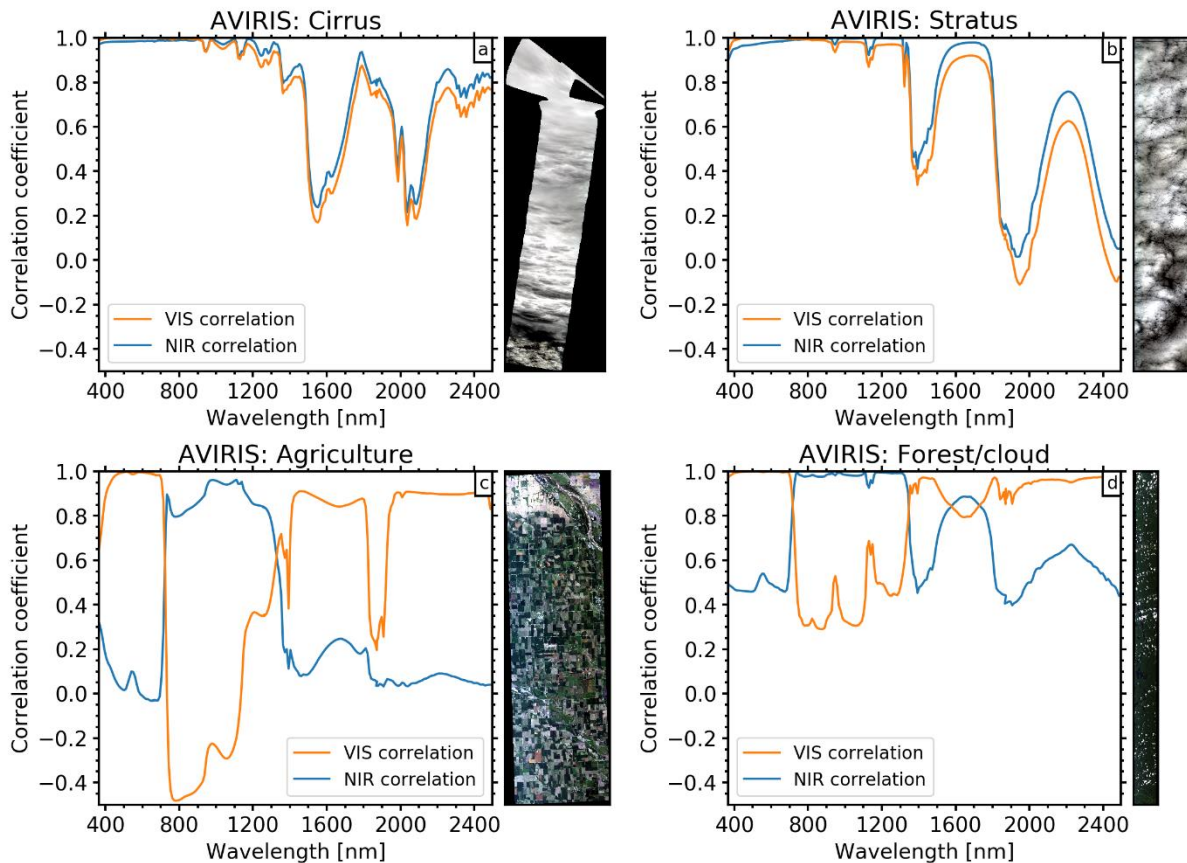

**Figure 6. Pearson correlation coefficient between upwelling spectral radiances at aircraft altitude and the VIS (orange) and NIR (blue) sub-band radiances for AVIRIS scenes of (a) marine cirrus cloud, (b) marine stratocumulus cloud, (c) agriculture, and (d) mixed forest and cumulus clouds. The true-colour image associated with the AVIRIS observations is given to the right of each plot.**

255 With multiple lines of evidence supporting 555 nm radiance as a reliable analogue for VIS sub-band radiance, we proceed to stratify the globally-representative CLARREO OSSE results by scene type to gain further insights as to why. Using the profile properties that were input to the CLARREO OSSE, we stratify scenes following the simple ERBE definitions of clear sky (0-5%), partly cloudy (5-50%), mostly cloudy (50-95%), and overcast (95-100%), and surface type categories of ocean, land, snow, and desert (henceforth “ERBE-like”; Suttles et al., 1988). When analyzing the spectral relationships by ERBE-like scene type, we found that one of the most challenging scene types is mostly cloudy over ocean. For this scene type, a large spread in the relationship between 865 nm and the NIR sub-band occurs, with data loosely falling into three branches associated with changes in cloud altitude (Figure 7a). This occurs for two primary reasons: variations in water vapor above clouds and cloud thermodynamic phase. While 865 nm is largely insensitive to variations in these properties, the NIR sub band is substantially influenced by differences in water vapor, cloud liquid, and cloud ice absorption 260 (e.g., Gristey and Chiu, 2022; Gristey et al., 2019). Meanwhile, the same scenes exhibit very little spread in the relationship between 555 nm and VIS (Figure 7b), as shown by the increase in the r-squared value from 0.951 to 0.996. This difference is 265

due to the fact that both 555 nm and VIS are largely insensitive to spectral absorption features of water in its various thermodynamic phases.

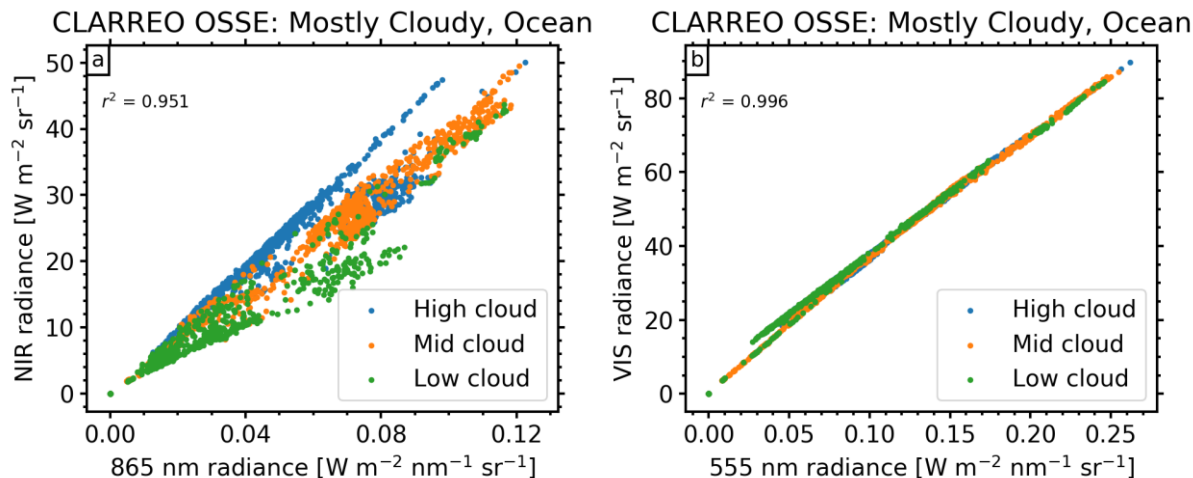

270 **Figure 7. Relationship between nadir radiance at (a) 865 nm and the NIR sub-band, and (b) 555 nm and the VIS sub-band for mostly cloudy over ocean scenes in the CLARREO OSSE. Data points are colored as high cloud (blue), mid-level cloud (orange), or low cloud (green), defined using the International Satellite Cloud Climatology Project (ISCCP) cloud top pressure boundaries.**

While the CLARREO OSSE has proven useful for assessing spectral relationships thus far, one of the major limitations in the context of ADMs is that it only includes nadir radiances. It is necessary that the spectral relationships hold at nadir, but not sufficient; since a spectral conversion is desired for angular sampling, it is also important to confirm that these results hold at off-nadir view geometries. The SCIAMACHY observations in Figure 5b and AVIRIS observations in Figure 6 include off-nadir views providing an initial indication that solar-viewing geometry is not playing a dominant role in the relationship between 555 nm and VIS radiances. A closer look with the CERES unfiltering dataset also suggests that any dependence on geometry is relatively small (Figure 8a-c). The tight relationship between 555 nm and VIS holds across all SZA, VZA, and RAA combinations within this dataset (only cloudy ocean scenes are shown, but the result is consistent for other scenes within the dataset that all have r-squared values greater than 0.97). There is no obvious trend in the relationship with SZA (Figure 8a) or RAA (Figure 8c), but there is a suggestion that limited spread in the spectral relationship is related to VZA (Figure 8b), with larger VZA tending to exhibit larger VIS radiance for the same 555 nm radiance. Beyond this qualitative statement, the dependence is difficult to quantify with the CERES unfiltering dataset given that it only includes calculations at 5 discrete VZAs. Following the CLARREO OSSE approach, an updated and far more extensive set of MODTRAN calculations that use finer resolution input profiles (in both space and time) and outputs radiances at fine angular resolution across the full range of solar-viewing geometries is currently under development. This dataset will be better suited to address detailed angular dependencies to implement the spectral conversion itself and quantify the associated uncertainties, and will be the subject of a subsequent dedicated study.

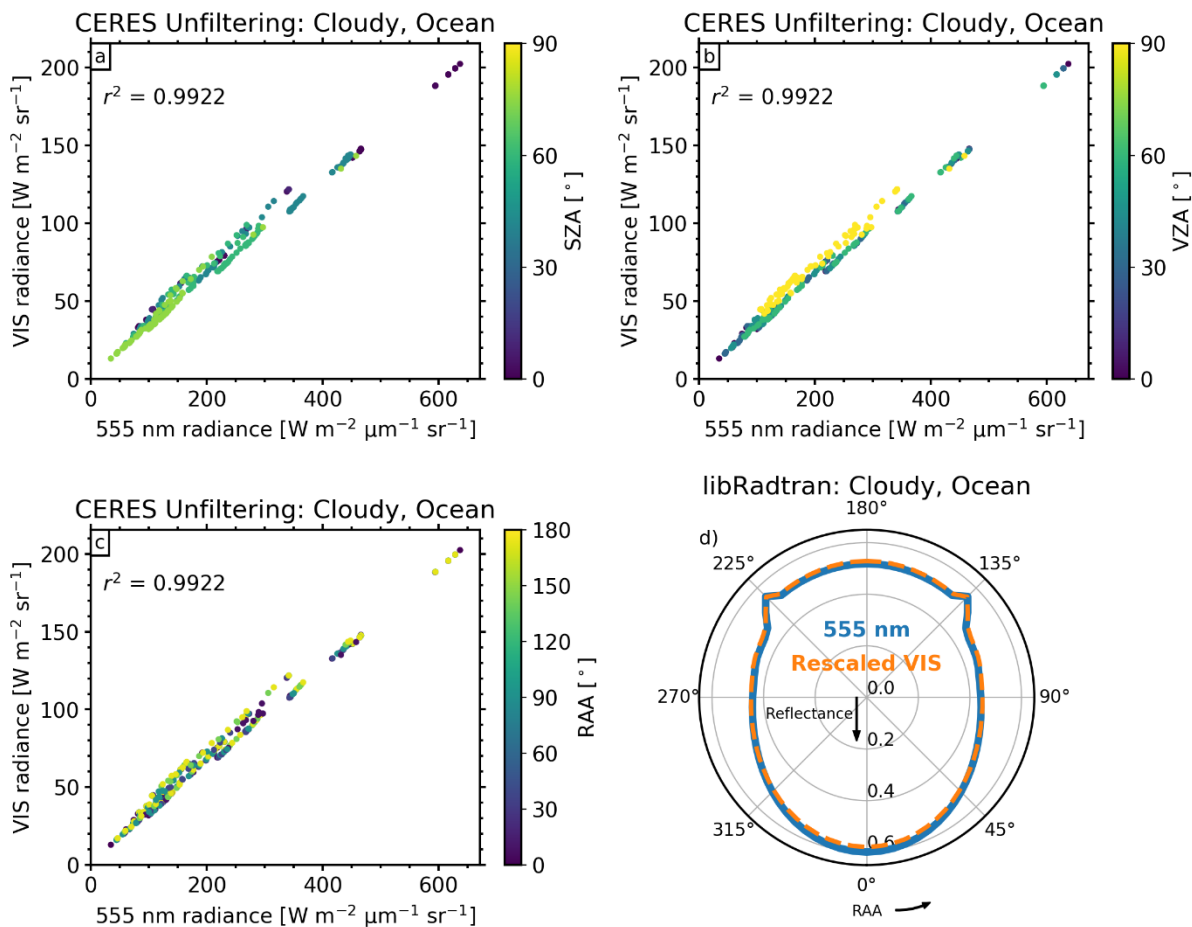

290

**Figure 8.** The relationship between 555 nm and VIS radiance in (a, b, c) the CERES unfiltering dataset for cloudy over ocean scenes with data points coloured by SZA, VZA and RAA, respectively, and in (d) the libRadtran calculation for a cloudy ocean scene at a fixed SZA ( $60^{\circ}$ ) and VZA ( $45^{\circ}$ ) showing the detailed variation in RAA.

The consistency of the relationship between 555 nm and VIS with solar-viewing geometry is further supported by a  
 295 libradtran calculation of TOA reflectance over a cloudy ocean scene as an example (Figure 8d). This calculation shows that  
 the detailed variations with relative azimuth angle follow an almost identical shape for both 555 nm and VIS, including the  
 peak in reflectance near  $\pm 45^{\circ}$  RAA associated with the cloud-bow. The correspondence between 555 nm and VIS also holds  
 with varying SZA, VZA and cloud optical depth (see Appendix A). Analysis of detailed angular variations should be  
 extended in the future to other scenes that might be more challenging such as sun-glint, but this result already builds  
 300 confidence that the tight spectral relationship also holds across detailed angular features to be incorporated into ADM  
 generation.

Another option to address the lack of observational angular sampling in the split-SW is to apply a spectral conversion  
 from total SW to split-SW to take advantage of the extensive angular sampling already obtained from the CERES  
 instruments (Norman Loeb, personal communication). While this approach certainly warrants further investigation, it would

305 undoubtedly require further scene stratification during the spectral conversion because the total SW includes the NIR spectral complexities discussed above. This could potentially be overcome by making the spectral conversion a function of properties such as the above cloud water vapor. However, these properties would then need to be retrieved for every CERES footprint, which comes with its own challenges and uncertainties. We intentionally avoid these uncertainties for now given that such properties are important factors in determining where energy is deposited in the atmosphere, which is precisely  
310 what the split-SW observations can help to inform us on (Hakuba et al., 2022; Carlson et al., 2019; Collins et al., 2006).

### 5 Synthetic camera angular sampling

To quantify the capability of a camera to provide dense angular sampling of various scene types required for rapid ADM generation, we ran a simulation experiment to project the camera sampling onto existing satellite retrievals. Figure 9 shows an example of instantaneous camera sampling following application of the pixel masks outlined in Section 3 onto the  
315 CERES Cookie Dough data described in Section 2. By matching the ADM samples to the underlying geophysical retrievals, we can determine the scene characteristics that a camera would have observed if it were flying on an existing satellite, in this case NOAA-20. It is immediately apparent that some ADM samples fall outside the Cookie Dough data (shown in purple). This is because VIIRS does not scan all the way to the horizon, whereas a WFOV camera would capture those geometries (see Figure 2). However, most ADM samples are co-located with the Cookie Dough data (shown in red), including at acute  
320 VZA in the along-track directions with a modest time offset.

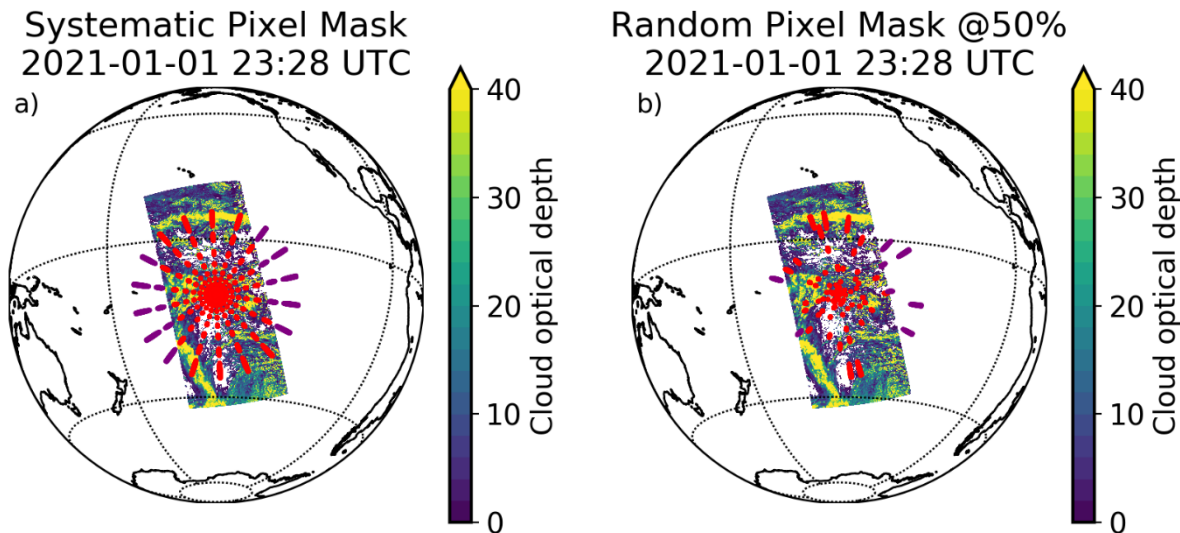

325 **Figure 9.** An example of instantaneous synthetic camera sampling over the Pacific Ocean for (a) a systematic camera pixel mask with ADM samples at the centre of every CERES-TRMM angular bin, and (b) a randomized camera pixel mask with ADM samples randomly located in only 50% of CERES-TRMM angular bins. ADM samples in red indicate that all pixels are co-located with VIIRS (retrieved cloud optical depth  $\pm 9$  min is shown in colours as an example, which covers the instantaneous WFOV), while ADM samples in purple indicate that at least one pixel in the ADM sample falls outside the VIIRS swath. Snapshot is valid on 1 January 2021 at 23:28 UTC.

For each camera pixel within an ADM sample that is co-located with the Cookie Dough, we determine the cloud fraction and surface type via nearest interpolation to the co-located Cookie Dough data. The surface type provided in the Cookie Dough is based on the International Geosphere–Biosphere Programme (IGBP) surface classification, which we map to ERBE-like surface types using Table 2. We then calculate the surface type for an ADM sample as the mode of the pixel-level values and the cloud fraction as the mean of the pixel-level values. This enables us to assign the ADM sample to an ERBE-like scene type, providing an initial look at camera angular sampling stratified by scene type.

**Table 2. Mapping between IGBP and ERBE-like surface types. Three additional categories accounting for the variable surface in the cryosphere are added for CERES processing from the National Snow and Ice Data Center (NSIDC).**

| IGBP index  | IGBP surface type                   | ERBE surface type |
|-------------|-------------------------------------|-------------------|
| 1           | Evergreen needle-leaf forest        | Land              |
| 2           | Evergreen broad-leaf forest         | Land              |
| 3           | Deciduous needle-leaf forest        | Land              |
| 4           | Deciduous broad-leaf forest         | Land              |
| 5           | Mixed forest                        | Land              |
| 6           | Closed shrubland                    | Land              |
| 7           | Open shrubland (desert)             | Desert            |
| 8           | Woody savanna                       | Land              |
| 9           | Savanna                             | Land              |
| 10          | Grassland                           | Land              |
| 11          | Permanent wetland                   | Land              |
| 12          | Cropland                            | Land              |
| 13          | Urban and built-up                  | Land              |
| 14          | Cropland/natural vegetation mosaics | Land              |
| 15          | Permanent snow and ice              | Snow              |
| 16          | Barren (desert)                     | Desert            |
| 17          | Water                               | Ocean             |
| N/A (NSIDC) | Tundra                              | Land              |
| N/A (NSIDC) | Fresh snow                          | Snow              |
| N/A (NSIDC) | Sea ice                             | Snow              |

After just 23-hours of sampling with the systematic pixel mask (Figure 10, left half of plots), almost all angular bins for all scene types are sampled. The most frequent scene types (e.g., cloudy ocean) typically have every angular bin filled with hundreds-to-thousands of samples, whereas the least frequent scene types (e.g., cloudy desert) typically have around ten or less samples in each angular bin. Only a couple of sporadic angular bins are not sampled in the outer VZA, mainly because less ADM samples are co-located with the Cookie Dough data (see Figure 9) and therefore are not included in the counts.

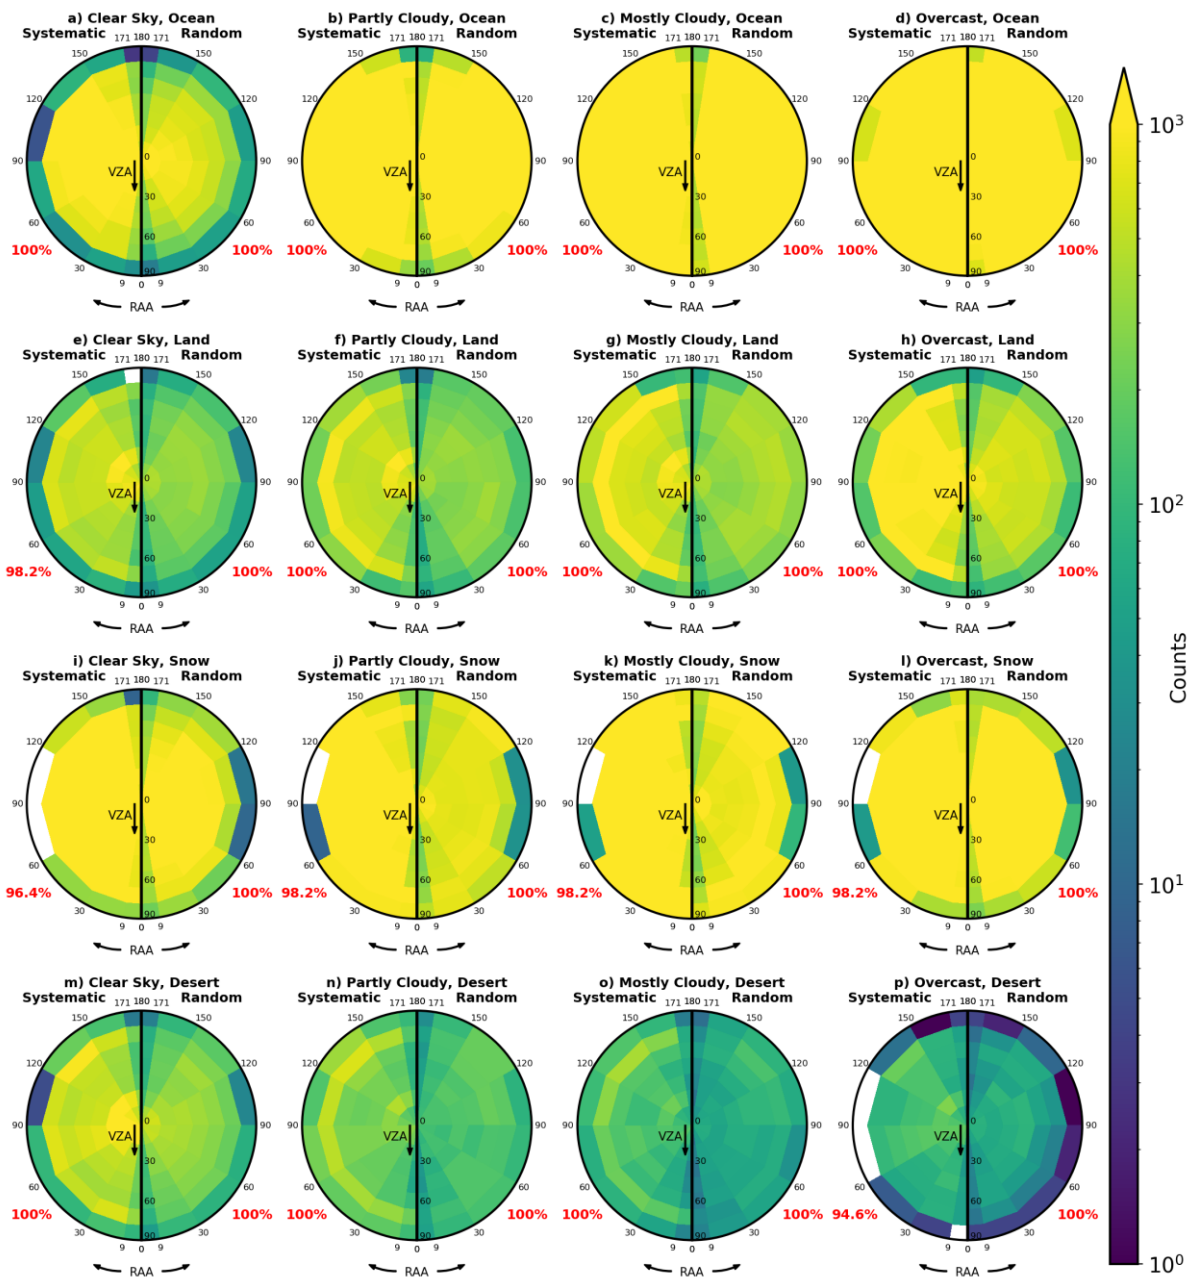

Figure 10. Number of samples in each ERBE-like angular bin and scene type after 23-hours of synthetic camera sampling. White color indicates no samples. On each plot (a–p) results from the systematic pixel mask are shown on the left, and results from the randomized pixel mask with a 50% scaling factor on the right. The percentage of angular bins filled in each case is given in red. No stratification by solar zenith angle is shown. Data from 1 January 2021.

345

The same 23-hours of sampling with the randomized pixel mask at a scaling factor of 50% (Figure 10, right half of plots) also provides excellent angular sampling of these scene types. Despite the overall count being reduced by half, every angular bin for every scene type contains at least one sample in this configuration. This result is broadly consistent across 3 other

350 simulated days spanning the annual cycle (1 Apr, 1 Jul, 1 Oct; not shown), and therefore is not dependant on the specific day chosen. Due to the improved angular coverage and the reduced data rate, the randomized pixel mask at a scaling factor of 50% is used in the remainder of this section to explore the sampling in further detail.

One major difference between the ERBE-like scene types applied thus far and those used in CERES products is the additional scene stratification by cloud optical depth. Since this variable is included in the Cookie Dough data, we can also  
 355 look at the angular sampling as a function of cloud optical depth. For the most frequent scene type of overcast ocean (Figure 11, left half of plots), the angular sampling remains excellent within CERES-TRMM land cloud optical depth bins. However, for the least frequent scene type of overcast desert (Figure 11, right half of plots), sampling gaps start to appear. This suggests that generation of camera-based ADMs for infrequent scenes that are stratified beyond ERBE-like would benefit from more than a single day of sampling. However, it is clear that ample angular sampling will be achieved in a  
 360 much shorter timeframe than could otherwise be achieved by traditional RAPS sampling, likely days-to-weeks rather than months-to-years.

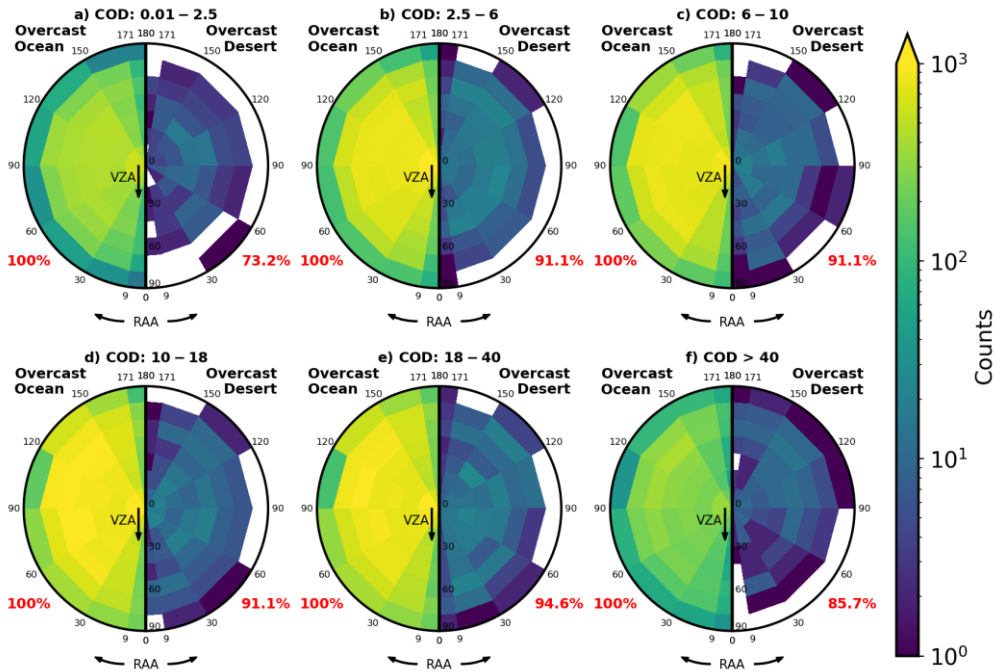

365 **Figure 11. Number of samples in ERBE-like angular bins and scene types after 23-hours of synthetic camera sampling with the randomized pixel mask with a 50% scaling factor, additionally stratified by (a–f) CERES-TRMM cloud optical depth (COD) bins over land. White color indicates no samples. On each subplot, results are shown for the most frequent scene type of overcast ocean on the left and the least frequent scene type of overcast desert on the right. The percentage of angular bins filled in each case is given in red. Data from 1 January 2021.**

Another dimension of ADMs not yet explored is the SZA. Figure 12 shows that angular sampling reduces with the additional stratification by CERES-TRMM SZA bins, as expected. However, this does not occur monotonically as  
 370 demonstrated by the two most challenging cases of snow surfaces (with the notable gaps at high sun) and desert surfaces



375

(with notable gaps at both high and low sun). For snow covered surfaces, this is due to their occurrence mostly at high latitudes where high sun is never encountered. For desert surfaces, this is related to the sun synchronous 13:30 equator crossing orbit of NOAA-20 that passes over the low-latitude deserts in mid-afternoon when the sun is reasonably high in the sky, but not directly overhead. Unlike the other ADM dimensions, the SZA dependence exhibits a notable seasonal dependence (see Appendix B not shown) ~~as Earth's declination angle varies and therefore Earth's surfaces are tilted either toward or away from the Sun.~~ In practice, these missing angular bins can often be filled with radiative transfer calculations or directional reciprocity (di Girolamo et al., 1998; Davies, 1994; Chandrasekhar, 1960). It should be noted that, since these sampling gaps are related to the orbital characteristics, they are not unique to the camera approach presented here: similar sampling gaps can be expected with the traditional radiometer RAPS approach. In fact, the sampling is in a sense self-balanced, in that the superimposed SZA and scene statistics built up from camera sampling for ADM generation encounter a similar frequency of occurrence to the radiometer that will use these ADMs, given that they are flying on the same platform and that the radiometer cross-track scan always falls within camera field-of-view.

380

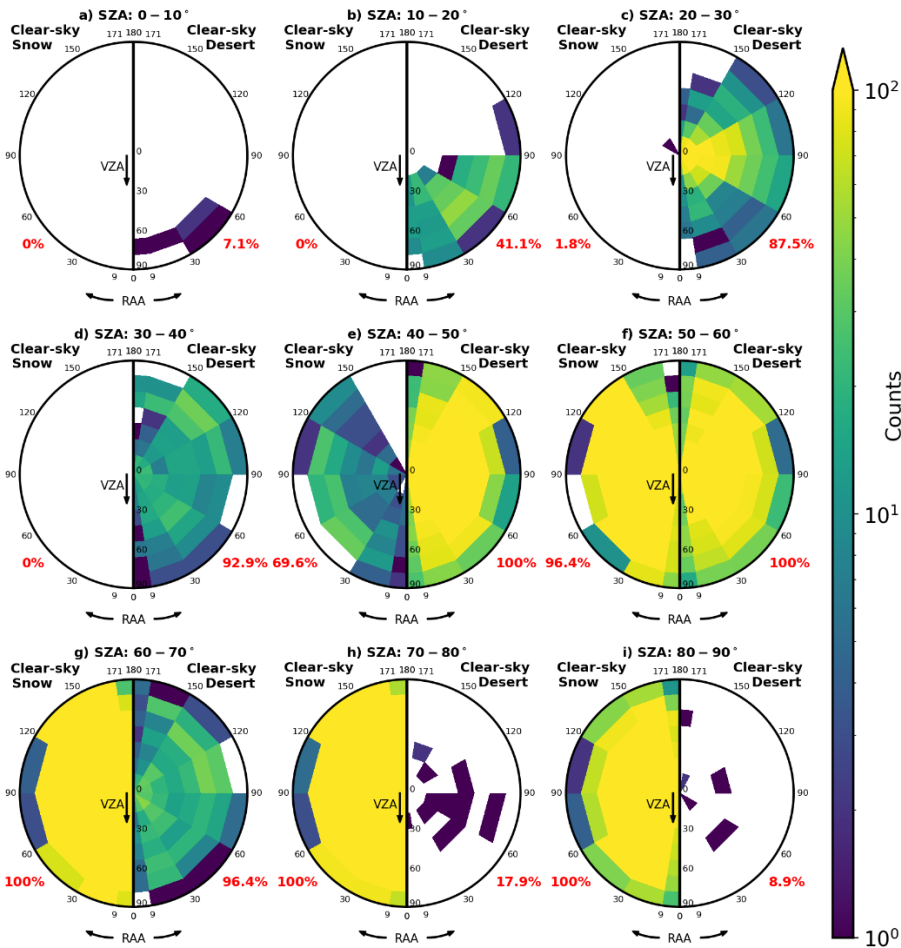

385 **Figure 12. Number of samples in ERBE-like angular bins and scene types after 23-hours of synthetic camera sampling with the randomized pixel mask with a 50% scaling factor, additionally stratified by (a–f) CERES-TRMM solar zenith angle (SZA) bins. White color indicates no samples. On each subplot, results are shown for the most challenging cases of clear-sky snow on the left and clear-sky desert on the right. The percentage of angular bins filled in each case is given in red. Data from 1 January 2021. Note that the maximum extent of the colour bar is reduced from one thousand in Figure 10 and Figure 11 to one hundred here.**

## 6 Summary and Conclusions

390 Satellite-based Earth radiation budget (ERB) data products depend critically on conversion of measured radiances to derived irradiances, achieved via angular distribution models (ADMs). In this study, we present the concept of a space-based camera that views the Earth from horizon-to-horizon with a large pixel array at a single wavelength to serve as a valuable resource for the generation of new ADMs. Specifically, we focus on the capability of a camera proposed to fly as part of the upcoming Libera mission to provide angular sampling required to generate ADMs for the new split-SW spectral channel that  
395 Libera will host.

We start by addressing an immediate issue that arises when dealing with high-resolution camera images in space: the sheer amount of bandwidth required for frequent downlink of large arrays of pixels is operationally difficult. We note that entire camera images are not necessary for ADM generation, so we instead design a pixel mask that extracts only a small subset of pixels from each image. The presented pixel mask includes multiple groups of pixels that each encompass the  
400 Libera radiometer footprint, are randomly distributed across and within the discrete CERES-TRMM angular bins, and can be scaled according to the available bandwidth. We target a 50% scaling (50% of the angular bins are sampled in each image) that extracts less than 1% of the pixels in each image.

Having extracted appropriate pixels from camera images, a spectral conversion is required to use single wavelength radiances to generate split-SW ADMs. Various established and independent datasets all indicate that using a mid-visible  
405 wavelength to represent the VIS sub-band is the optimal choice, with physical reasoning supporting this choice revealed by analysing spectral relationships by scene type. Spectral relationships involving the NIR are more complicated due to variations in the spectral absorption features of water in all three thermodynamic phases, and variations in surface bi-directional reflectance. In contrast, the relationship between 555 nm and the VIS sub-band is largely insensitive to these properties, requiring only basic stratification by scene type and solar-viewing geometry to generate “proxy” VIS radiances.

410 With proxy VIS radiances distributed across angular bins, we finally quantify how the angular bins of different scene types are sampled by projecting this camera sampling onto retrieved scene properties from the existing NOAA-20 satellite. After less than a day of sampling, ERBE-like scene types and angular bins are found to be exceptionally well sampled, with every VZA and RAA bin of every scene type receiving at least one sample, and in most cases many more. Some unavoidable gaps remain in the SZA dimension, and additional stratification by cloud optical depth leads to some unsampled angular bins  
415 for infrequent scene types within this short timeframe.

While this study demonstrates the potential of a camera to augment existing ERB approaches, there are caveats that need mentioning. The presented pixel masks work well but are not necessarily optimal and could be refined further. The spectral

conversion between 555 nm and VIS needs to be implemented, with a closer look at the angular dependencies; a new product is under development for this purpose and will be the focus of a subsequent study. Likewise, the synthetic angular sampling could be extended to a longer-duration dataset, which would more precisely quantify the timescale required to generate ADMs similar to current CERES SW ADMs that are substantially more stratified. More broadly, ADM generation is only one benefit that needs to be balanced with other potential ERB applications of a camera. We stress that camera-based ADMs for the Libera split-SW channels are intended as a demonstration, and sit within a wider Libera split-SW ADM approach that will ultimately be constrained and tested with RAPS observations from the split-SW radiometers.

In summary, split-SW ADM generation for either ERBE-like scene types or more stratified scenes types will be possible in a substantially shorter timeframe than that from existing approaches if radiances from a monochromatic camera are used: days–weeks rather than months–years. This result can pave the way for the development of shortwave irradiance products across arbitrary sets of spectral bands through the use of monochromatic or polychromatic cameras with judiciously-chosen, high-correlation wavelengths.

#### **Appendix A: Further exploration of the angular reflectance correspondence between 555 nm and VIS**

A representative example of the close correspondence between 555 nm and VIS reflectance as a function of RAA was shown in Figure 8d using a fixed SZA, VZA, and scene. Figure A1 provides further exploration of this relationship. It shows that at least as good correspondence exists across a variety of different SZA, VZA, and cloud optical depth combinations. This is not, nor is it intended to be, a comprehensive exploration of angle and scene space, but rather provide a broader perspective to the example presented in Figure 8d. The consistently close correspondence indicates that the spectral conversion that needs to be applied to map between the angular distribution at 555 nm (observed by the proposed camera) and VIS (the radiometer spectral channel of interest) is both minor and straightforward, thus reinforcing the conclusions of the study. Note that the scaling factor shown in each plot, which is separate to the RAA correspondence, varies between 0.93–0.98. This represents a single overall scaling in each case applied to rescale the VIS reflectance at each RAA, and is expected given the spectrally varying scattering and absorption properties of the Earth system.

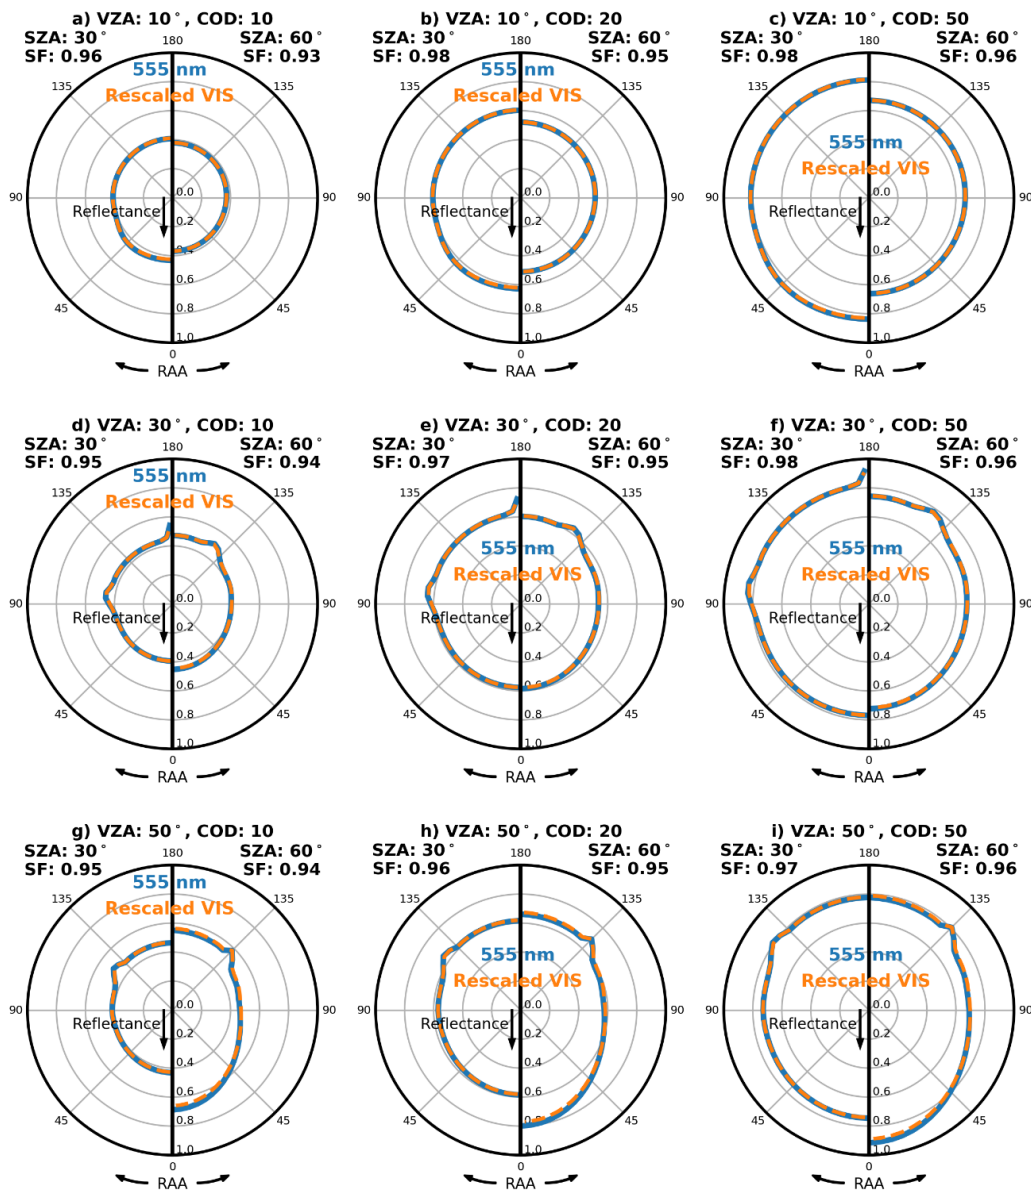

**Figure A1. Similar to Figure 8d but for (a-i) various combinations of SZA, VZA and cloud optical depth (COD). Unlike Figure 8d, only 0–180° is shown for each case since the result is azimuthally symmetric. The scaling factor (SF) between the mean reflectance at 555 nm and VIS across all RAA for each case is also given.**

445

**Appendix B: Further exploration of the SZA dependence of sampling**

A representative example of synthetic camera angular sampling when stratified by SZA was given in Figure 12 for data on 1 January 2021. However, as Earth's declination angle varies throughout the year, surfaces are tilted either toward or away from the Sun resulting in a seasonal dependence of the sampling when stratified by SZA, especially from a sun-synchronous orbit. Figures A2–A4 provide insight into this seasonal dependence. They show that when the synthetic sampling is repeated for three other days evenly spread across the annual cycle, the location of the missing angular bins for clear-sky snow and desert scenes shifts. It follows that there are benefits to collecting observations across a full annual cycle if the goal is to observe as much of the angular-scene space as possible from a sun-synchronous orbit.

450

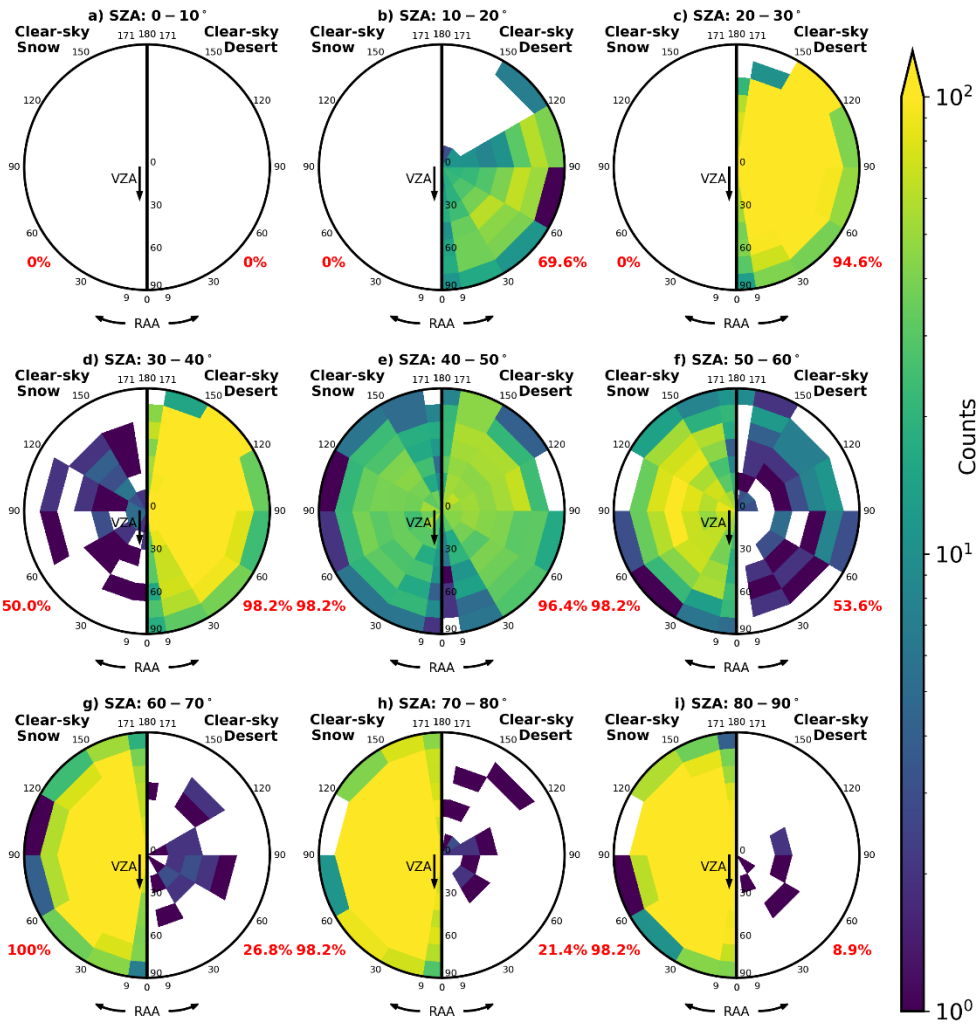

455

**Figure A2. Same as Fig. 12, but for 1 April 2021.**

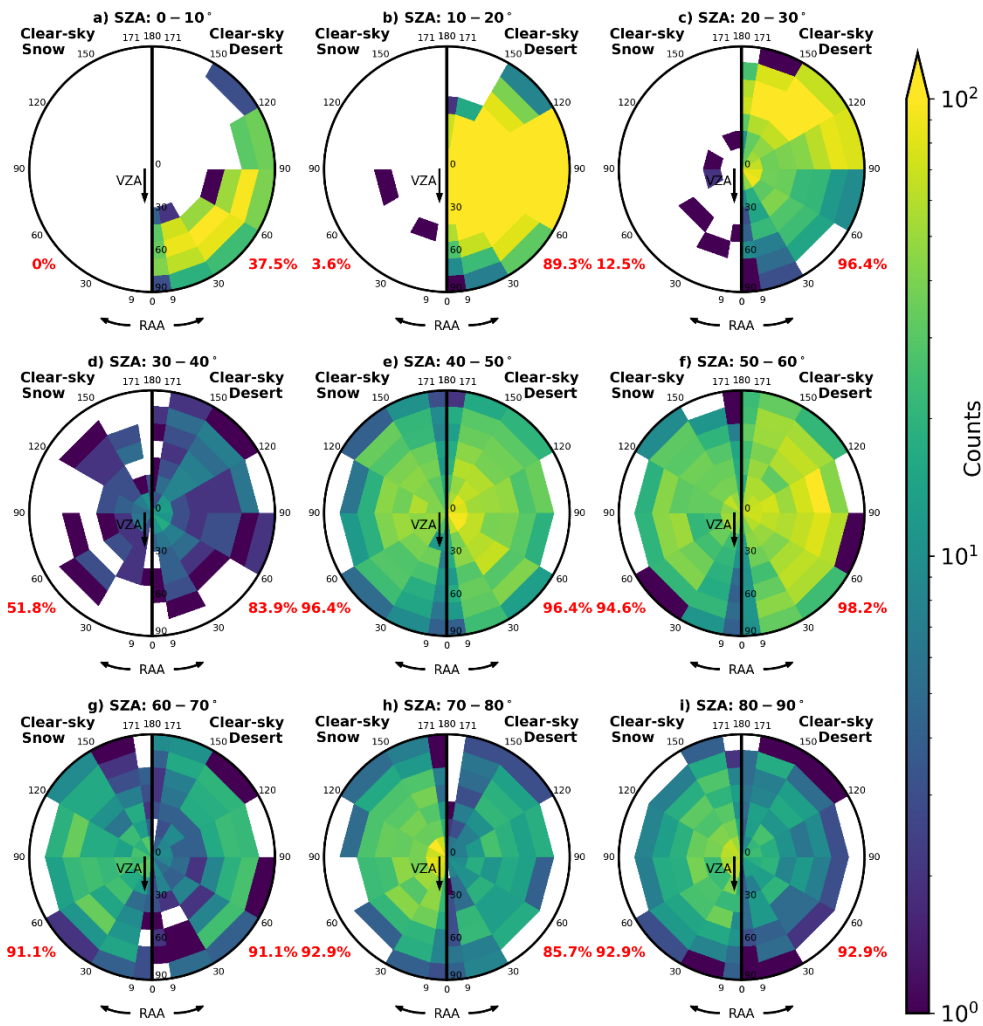

**Figure A3. Same as Fig. 12, but for 1 July 2021.**

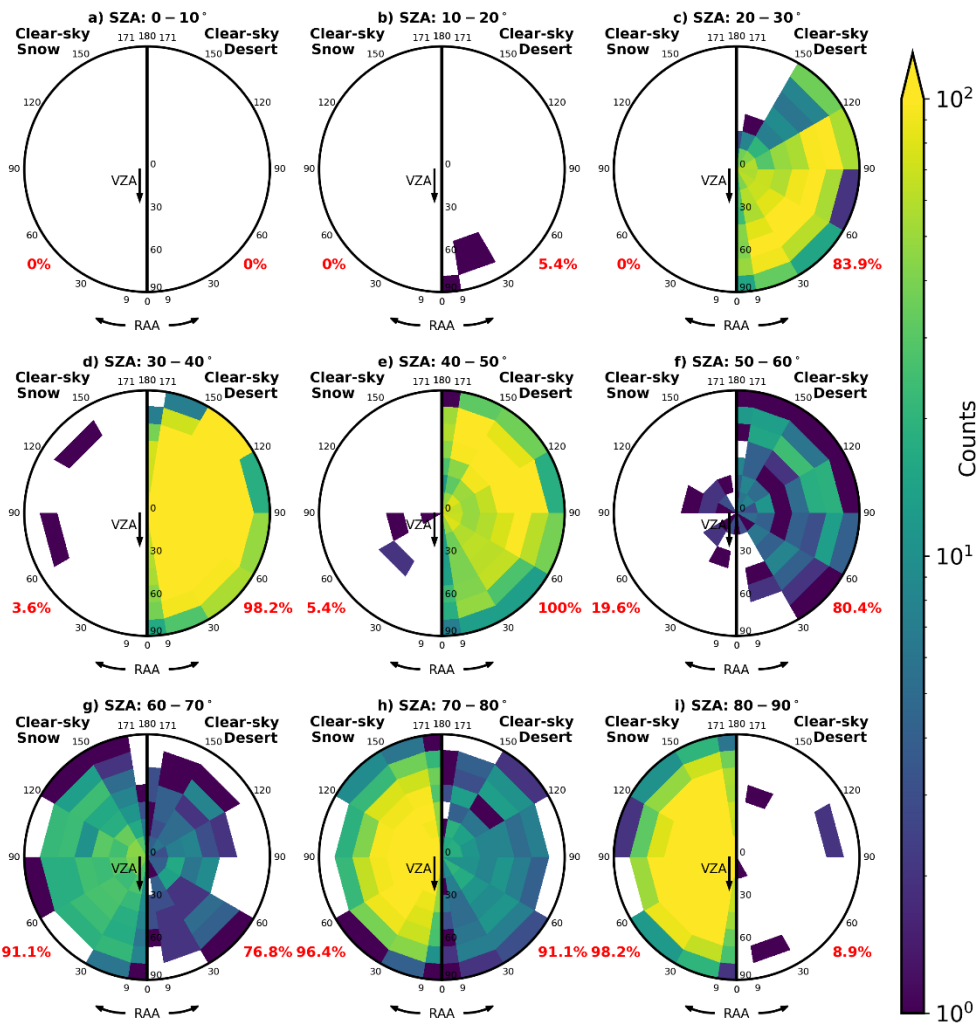

460 **Figure A4. Same as Fig. 12, but for 1 October 2021.**

### Data Availability

All datasets used in this study have been made available at [https://csl.noaa.gov/groups/csl9/datasets/data/cloud\\_phys/2023-Gristey-et al/](https://csl.noaa.gov/groups/csl9/datasets/data/cloud_phys/2023-Gristey-et al/).

### Author Contribution

465 J.J.G. and K.S.S. conceived and designed the study with input from all authors. J.J.G. wrote the manuscript and created all final figures. D.R.F. produced the CLARREO OSSE, B.C.K. selected and retrieved the AVIRIS data for Figure 6, J.M.

provided the analysis for Figure 8a–c, and H.C. provided the analysis for Figure 8d. The manuscript received substantial editing from all authors.

### **Competing Interests**

470 K.S.S. is a member of the editorial board of Atmospheric Measurement Techniques. The peer-review process was guided by an independent editor, and the authors have no other competing interests to declare.

### **Acknowledgments**

This work was supported by the Earth Venture Continuity 1 (EVC-1): Libera project under NASA Contract 80LARC20D0006. J.J.G. acknowledges support from the NOAA Cooperative Agreement with CIRES, NA22OAR4320151.

475 The authors thank the CERES science team, specifically Walter Miller, Kathleen DeJwakh, and Norman Loeb for their open sharing and guidance of CERES datasets.

### **References**

- Barkstrom, B. R.: The Earth Radiation Budget Experiment (ERBE), *Bull Am Meteorol Soc*, 65, 1170–1185, [https://doi.org/10.1175/1520-0477\(1984\)065<1170:TERBE>2.0.CO;2](https://doi.org/10.1175/1520-0477(1984)065<1170:TERBE>2.0.CO;2), 1984.
- 480 Béland, S., Harder, J., and Woods, T.: Eleven years of tracking the SORCE SIM instrument degradation caused by space radiation and solar exposure, 91434W, <https://doi.org/10.1117/12.2057385>, 2014.
- Berk, A., Conforti, P., Kennett, R., Perkins, T., Hawes, F., and van den Bosch, J.: MODTRAN® 6: A major upgrade of the MODTRAN® radiative transfer code, Workshop on Hyperspectral Image and Signal Processing, Evolution in Remote Sensing, 2014-June, <https://doi.org/10.1109/WHISPERS.2014.8077573>, 2014.
- 485 Carlson, B., Lacis, A., Colose, C., Marshak, A., Su, W., and Lorentz, S.: Spectral Signature of the Biosphere: NISTAR Finds It in Our Solar System From the Lagrangian L-1 Point, *Geophys Res Lett*, 46, 10679–10686, <https://doi.org/10.1029/2019GL083736>, 2019.
- Ceppi, P. and Nowack, P.: Observational evidence that cloud feedback amplifies global warming, *Proc Natl Acad Sci U S A*, 118, e2026290118, [https://doi.org/10.1073/PNAS.2026290118/SUPPL\\_FILE/PNAS.2026290118.SAPP.PDF](https://doi.org/10.1073/PNAS.2026290118/SUPPL_FILE/PNAS.2026290118.SAPP.PDF), 2021.
- 490 Cesana, G. v. and del Genio, A. D.: Observational constraint on cloud feedbacks suggests moderate climate sensitivity, *Nature Climate Change* 2021 11:3, 11, 213–218, <https://doi.org/10.1038/s41558-020-00970-y>, 2021.
- Chandrasekhar, S.: Radiative Transfer, Dover Publications, 416 pp., 1960.
- Chen, H., Schmidt, S., Massie, S. T., Nataraja, V., Norgren, M. S., Gristey, J. J., Feingold, G., Holz, R. E., and Iwabuchi, H.: The Education and Research 3D Radiative Transfer Toolbox (EaR3T) – Towards the Mitigation of 3D Bias in Airborne and



- 495 Spaceborne Passive Imagery Cloud Retrievals, *Atmospheric Measurement Techniques Discussion*,  
<https://doi.org/https://doi.org/10.5194/amt-2022-143>, 2022.
- Collins, W. D., Lee-Taylor, J. M., Edwards, D. P., and Francis, G. L.: Effects of increased near-infrared absorption by water vapor on the climate system, *Journal of Geophysical Research: Atmospheres*, 111, 18109, <https://doi.org/10.1029/2005JD006796>, 2006.
- 500 Corbett, J. and Su, W.: Accounting for the effects of sastrugi in the CERES clear-sky Antarctic shortwave angular distribution models, *Atmos Meas Tech*, 8, 3163–3175, <https://doi.org/10.5194/amt-8-3163-2015>, 2015.
- Davies, R.: Spatial autocorrelation of radiation measured by the Earth Radiation Budget Experiment: Scene inhomogeneity and reciprocity violation, *J Geophys Res*, 99, <https://doi.org/10.1029/94JD01680>, 1994.
- Diner, D. J., Beckert, J. C., Reilly, T. H., Bruegge, C. J., Conel, J. E., Kahn, R. A., Martonchik, J. v., Ackerman, T. P.,  
505 Davies, R., Gerstl, S. A. W., Gordon, H. R., Muller, J. P., Myneni, R. B., Sellers, P. J., Pinty, B., and Verstraete, M. M.: Multi-angle imaging spectroradiometer (MISR) instrument description and experiment overview, *IEEE Transactions on Geoscience and Remote Sensing*, 36, 1072–1087, <https://doi.org/10.1109/36.700992>, 1998.
- Emde, C., Buras-Schnell, R., Kylling, A., Mayer, B., Gasteiger, J., Hamann, U., Kylling, J., Richter, B., Pause, C., Dowling, T., and Bugliaro, L.: The libRadtran software package for radiative transfer calculations (version 2.0.1), *Geosci. Model Dev*,  
510 9, 1647–1672, <https://doi.org/10.5194/gmd-9-1647-2016>, 2016.
- Feldman, D. R., Algeri, C. A., Ong, J. R., and Collins, W. D.: CLARREO shortwave observing system simulation experiments of the twenty-first century: Simulator design and implementation, *J Geophys Res*, 116, D10107, <https://doi.org/10.1029/2010JD015350>, 2011a.
- Feldman, D. R., Algeri, C. A., Collins, W. D., Roberts, Y. L., and Pilewskie, P. A.: Simulation studies for the detection of  
515 changes in broadband albedo and shortwave nadir reflectance spectra under a climate change scenario, *Journal of Geophysical Research: Atmospheres*, 116, D24103, <https://doi.org/10.1029/2011JD016407>, 2011b.
- Feldman, D. R., Collins, W. D., and Paige, J. L.: Pan-spectral observing system simulation experiments of shortwave reflectance and long-wave radiance for climate model evaluation, *Geosci Model Dev*, 8, 1943–1954, <https://doi.org/10.5194/gmd-8-1943-2015>, 2015.
- 520 Forster, P. M. F. and Gregory, J. M.: The Climate Sensitivity and Its Components Diagnosed from Earth Radiation Budget Data, *J Clim*, 19, 39–52, <https://doi.org/10.1175/JCLI3611.1>, 2006.
- di Girolamo, L., Várnai, T., and Davies, R.: Apparent breakdown of reciprocity in reflected solar radiances, *Journal of Geophysical Research: Atmospheres*, 103, 8795–8803, <https://doi.org/10.1029/98JD00345>, 1998.
- Gottwald, M. and Bovensmann, H. (Eds.): *SCIAMACHY - Exploring the Changing Earth's Atmosphere*, Springer  
525 Netherlands, Dordrecht, <https://doi.org/10.1007/978-90-481-9896-2>, 2011.
- Green, R. O., Eastwood, M. L., Sarture, C. M., Chrien, T. G., Aronsson, M., Chippendale, B. J., Faust, J. A., Pavri, B. E., Chovit, C. J., Solis, M., Olah, M. R., and Williams, O.: Imaging Spectroscopy and the Airborne Visible/Infrared Imaging Spectrometer (AVIRIS), *Remote Sens Environ*, 65, 227–248, [https://doi.org/10.1016/S0034-4257\(98\)00064-9](https://doi.org/10.1016/S0034-4257(98)00064-9), 1998.

- Gristey, J. J. and Chiu, J. C.: Understanding our Climate System through the Lens of Spectral Reflected Solar Radiation, in: International Radiation Symposium, 2022.
- 530 Gristey, J. J., Christine Chiu, J., Gurney, R. J., Shine, K. P., Havemann, S., Thelen, J. C., and Hill, P. G.: Shortwave Spectral Radiative Signatures and Their Physical Controls, *J Clim*, 32, 4805–4828, <https://doi.org/10.1175/JCLI-D-18-0815.1>, 2019.
- Gristey, J. J., Su, W., Loeb, N. G., Vonder Haar, T. H., Tornow, F., Schmidt, K. S., Hakuba, M. Z., Pilewskie, P., and Russell, J. E.: Shortwave Radiance to Irradiance Conversion for Earth Radiation Budget Satellite Observations: A Review, 535 *Remote Sensing* 2021, Vol. 13, Page 2640, 13, 2640, <https://doi.org/10.3390/RS13132640>, 2021.
- Hakuba, M. Z., Kindel, B., Gristey, J. J., Bodas-Salcedo, A., Stephens, G., and Pilewskie, P.: Simulated variability in visible and near-IR irradiances in preparation for the upcoming Libera mission, in: International Radiation Symposium, 2022.
- Harries, J. E., Russell, J. E., Hanafin, J. A., Brindley, H., Futyran, J., Rufus, J., Kellock, S., Matthews, G., Wrigley, R., Last, A., Mueller, J., Mossavati, R., Ashmall, J., Sawyer, E., Parker, D., Caldwell, M., Allan, P. M., Smith, A., Bates, M. J., Coan, 540 B., Stewart, B. C., Lepine, D. R., Cornwall, L. A., Corney, D. R., Ricketts, M. J., Drummond, D., Smart, D., Cutler, R., Dewitte, S., Clerbaux, N., Gonzalez, L., Ipe, A., Bertrand, C., Joukoff, A., Crommelynck, D., Nelms, N., Llewellyn-Jones, D. T., Butcher, G., Smith, G. L., Szewczyk, Z. P., Mlynczak, P. E., Slingo, A., Allan, R. P., and Ringer, M. A.: The Geostationary Earth Radiation Budget Project, *Bull Am Meteorol Soc*, 86, 945–960, <https://doi.org/10.1175/BAMS-86-7-945>, 2005.
- 545 Hartmann, D. L. and Ceppi, P.: Trends in the CERES Dataset, 2000–13: The Effects of Sea Ice and Jet Shifts and Comparison to Climate Models, *J Clim*, 27, 2444–2456, <https://doi.org/10.1175/JCLI-D-13-00411.1>, 2014.
- Havemann, S., Thelen, J.-C., Taylor, J. P., and Harlow, R. C.: The Havemann-Taylor Fast Radiative Transfer Code (HT-FRTC): A multipurpose code based on principal components, *J Quant Spectrosc Radiat Transf*, 220, 180–192, <https://doi.org/10.1016/J.JQSRT.2018.09.008>, 2018.
- 550 Jacobowitz, H., Soule, H. V., Kyle, H. L., and House, F. B.: The Earth Radiation Budget (ERB) Experiment: An overview, *Journal of Geophysical Research: Atmospheres*, 89, 5021–5038, <https://doi.org/10.1029/JD089iD04p05021>, 1984.
- Kandel, R., Viollier, M., Raberanto, P., Duvel, J. P., Pakhomov, L. A., Golovko, V. A., Trishchenko, A. P., Mueller, J., Raschke, E., Stuhlmann, R. R., and Scientific Working Group (ISSWG), I. S. R. B.: The ScaRaB Earth Radiation Budget Dataset, *Bull Am Meteorol Soc*, 79, 765–783, [https://doi.org/10.1175/1520-0477\(1998\)079<0765:TSERBD>2.0.CO;2](https://doi.org/10.1175/1520-0477(1998)079<0765:TSERBD>2.0.CO;2), 555 1998.
- Kramer, R. J., He, H., Soden, B. J., Oreopoulos, L., Myhre, G., Forster, P. M., and Smith, C. J.: Observational Evidence of Increasing Global Radiative Forcing, *Geophys Res Lett*, 48, e2020GL091585, <https://doi.org/10.1029/2020GL091585>, 2021.
- Kyle, H. L., Arking, A., Hickey, J. R., Ardanuy, P. E., Jacobowitz, H., Stowe, L. L., Campbell, G. G., Vonder Haar, T., House, F. B., Maschhoff, R., and Smith, G. L.: The Nimbus Earth Radiation Budget (ERB) Experiment: 1975 to 1992, *Bull 560 Am Meteorol Soc*, 74, 815–830, [https://doi.org/10.1175/1520-0477\(1993\)074<0815:TNERBE>2.0.CO;2](https://doi.org/10.1175/1520-0477(1993)074<0815:TNERBE>2.0.CO;2), 1993.
- Loeb, N. G. and Wielicki, B. A.: Satellites and Satellite Remote Sensing: Earth’s Radiation Budget, in: *Encyclopedia of Atmospheric Sciences: Second Edition*, Elsevier Inc., 67–76, <https://doi.org/10.1016/B978-0-12-382225-3.00349-2>, 2015.

- Loeb, N. G., Priestley, K. J., Kratz, D. P., Geier, E. B., Green, R. N., Wielicki, B. A., Hinton, P. O., and Nolan, S. K.: Determination of Unfiltered Radiances from the Clouds and the Earth's Radiant Energy System Instrument, *Journal of Applied Meteorology*, 40, 822–835, [https://doi.org/10.1175/1520-0450\(2001\)040<0822:DOURFT>2.0.CO;2](https://doi.org/10.1175/1520-0450(2001)040<0822:DOURFT>2.0.CO;2), 2001.
- Loeb, N. G., Manalo-Smith, N., Kato, S., Miller, W. F., Gupta, S. K., Minnis, P., and Wielicki, B. A.: Angular Distribution Models for Top-of-Atmosphere Radiative Flux Estimation from the Clouds and the Earth's Radiant Energy System Instrument on the Tropical Rainfall Measuring Mission Satellite. Part I: Methodology, *Journal of Applied Meteorology*, 42, 240–265, [https://doi.org/10.1175/1520-0450\(2003\)042<0240:ADMFTO>2.0.CO;2](https://doi.org/10.1175/1520-0450(2003)042<0240:ADMFTO>2.0.CO;2), 2003a.
- Loeb, N. G., Loukachine, K., Manalo-Smith, N., Wielicki, B. A., and Young, D. F.: Angular distribution models for top-of-atmosphere radiative flux estimation from the clouds and the Earth's Radiant Energy system instrument on the Tropical Rainfall Measuring Mission satellite. Part II: Validation, *Journal of Applied Meteorology*, 42, 1748–1769, [https://doi.org/10.1175/1520-0450\(2003\)042<1748:ADMFTR>2.0.CO;2](https://doi.org/10.1175/1520-0450(2003)042<1748:ADMFTR>2.0.CO;2), 2003b.
- Loeb, N. G., Kato, S., Loukachine, K., and Manalo-Smith, N.: Angular Distribution Models for Top-of-Atmosphere Radiative Flux Estimation from the Clouds and the Earth's Radiant Energy System Instrument on the *Terra* Satellite. Part I: Methodology, *J Atmos Ocean Technol*, 22, 338–351, <https://doi.org/10.1175/JTECH1712.1>, 2005.
- Loeb, N. G., Kato, S., Loukachine, K., Manalo-Smith, N., and Doelling, D. R.: Angular distribution models for top-of-atmosphere radiative flux estimation from the Clouds and the Earth's Radiant Energy System instrument on the Terra Satellite. Part II: Validation, *J Atmos Ocean Technol*, 24, 564–584, <https://doi.org/10.1175/JTECH1983.1>, 2007.
- Mayer, B. and Kylling, A.: Technical note: The libRadtran software package for radiative transfer calculations - Description and examples of use, *Atmos Chem Phys*, 5, 1855–1877, <https://doi.org/10.5194/ACP-5-1855-2005>, 2005.
- Minnis, P., Sun-Mack, S., Chen, Y., Chang, F. L., Yost, C. R., Smith, W. L., Heck, P. W., Arduini, R. F., Bedka, S. T., Yi, Y., Hong, G., Jin, Z., Painemal, D., Palikonda, R., Scarino, B. R., Spangenberg, D. A., Smith, R. A., Trepte, Q. Z., Yang, P., and Xie, Y.: CERES MODIS Cloud Product Retrievals for Edition 4 - Part I: Algorithm Changes, *IEEE Transactions on Geoscience and Remote Sensing*, 59, 2744–2780, <https://doi.org/10.1109/TGRS.2020.3008866>, 2021.
- Myers, T. A., Scott, R. C., Zelinka, M. D., Klein, S. A., Norris, J. R., and Caldwell, P. M.: Observational constraints on low cloud feedback reduce uncertainty of climate sensitivity, *Nat Clim Chang*, 11, 501–507, <https://doi.org/10.1038/s41558-021-01039-0>, 2021.
- Raghuraman, S. P., Paynter, D., and Ramaswamy, V.: Anthropogenic forcing and response yield observed positive trend in Earth's energy imbalance, *Nature Communications* 2021 12:1, 12, 1–10, <https://doi.org/10.1038/s41467-021-24544-4>, 2021.
- Raschke, E. and Bandeen, W. R.: The Radiation Balance of the Planet Earth from Radiation Measurements of the Satellite Nimbus II, *Journal of Applied Meteorology*, 9, 215–238, [https://doi.org/10.1175/1520-0450\(1970\)009<0215:trbotp>2.0.co;2](https://doi.org/10.1175/1520-0450(1970)009<0215:trbotp>2.0.co;2), 1970.
- Raschke, E., Vonder Haar, T. H., Bandeen, W. R., and Pasternak, M.: The Annual Radiation Balance of the Earth-Atmosphere System During 1969–70 from Nimbus 3 Measurements, *J Atmos Sci*, 30, 341–364, [https://doi.org/10.1175/1520-0469\(1973\)030<0341:TARBOT>2.0.CO;2](https://doi.org/10.1175/1520-0469(1973)030<0341:TARBOT>2.0.CO;2), 1973.

- Stephens, G. L., Li, J., Wild, M., Clayson, C. A., Loeb, N., Kato, S., L'Ecuyer, T., Stackhouse, P. W., Lebsock, M., and Andrews, T.: An update on Earth's energy balance in light of the latest global observations, *Nat Geosci*, 5, 691–696, <https://doi.org/10.1038/ngeo1580>, 2012.
- 600 Suttles, J., Green, R., Minnis, P., Smith, G., Staylor, W., Wielicki, B., Walker, I., Young, D., Taylor, V., and Stowe, L.: *Angular Radiation Models for Earth-Atmosphere Systems, Vol. I Shortwave Radiation*, Hampton, 1988.
- Su, W., Corbett, J., Eitzen, Z., and Liang, L.: Next-generation angular distribution models for top-of-atmosphere radiative flux calculation from CERES instruments: methodology, *Atmos Meas Tech*, 8, 611–632, <https://doi.org/10.5194/amt-8-611-2015>, 2015a.
- 605 Su, W., Corbett, J., Eitzen, Z., and Liang, L.: Next-generation angular distribution models for top-of-atmosphere radiative flux calculation from CERES instruments: Validation, *Atmos Meas Tech*, 8, 3297–3313, <https://doi.org/10.5194/amt-8-3297-2015>, 2015b.
- Tett, S. F. B., Rowlands, D. J., Mineter, M. J., and Cartis, C.: Can Top-of-Atmosphere Radiation Measurements Constrain Climate Predictions? Part II: Climate Sensitivity, *J Clim*, 26, 9367–9383, <https://doi.org/10.1175/JCLI-D-12-00596.1>, 2013a.
- 610 Tett, S. F. B., Mineter, M. J., Cartis, C., Rowlands, D. J., and Liu, P.: Can Top-of-Atmosphere Radiation Measurements Constrain Climate Predictions? Part I: Tuning, *J Clim*, 26, 9348–9366, <https://doi.org/10.1175/JCLI-D-12-00595.1>, 2013b.
- Trenberth, K. E.: An imperative for climate change planning: tracking Earth's global energy, *Curr Opin Environ Sustain*, 1, 19–27, <https://doi.org/10.1016/j.cosust.2009.06.001>, 2009.
- Trepte, Q. Z., Minnis, P., Sun-Mack, S., Yost, C. R., Chen, Y., Jin, Z., Hong, G., Chang, F. L., Smith, W. L., Bedka, K. M., and Chee, T. L.: Global Cloud Detection for CERES Edition 4 Using Terra and Aqua MODIS Data, *IEEE Transactions on Geoscience and Remote Sensing*, 57, 9410–9449, <https://doi.org/10.1109/TGRS.2019.2926620>, 2019.
- Vonder Haar, T. H. and Suomi, V. E.: Measurements of the Earth's Radiation Budget from Satellites During a Five-Year Period. Part I: Extended Time and Space Means, *J Atmos Sci*, 28, 305–314, [https://doi.org/10.1175/1520-0469\(1971\)028<0305:MOTERB>2.0.CO;2](https://doi.org/10.1175/1520-0469(1971)028<0305:MOTERB>2.0.CO;2), 1971.
- 620 Wielicki, B. A., Barkstrom, B. R., Harrison, E. F., Lee, R. B., Louis Smith, G., and Cooper, J. E.: Clouds and the Earth's Radiant Energy System (CERES): An Earth Observing System Experiment, *Bull Am Meteorol Soc*, 77, 853–868, [https://doi.org/10.1175/1520-0477\(1996\)077<0853:CATERE>2.0.CO;2](https://doi.org/10.1175/1520-0477(1996)077<0853:CATERE>2.0.CO;2), 1996.
- Wielicki, B. A., Young, D. F., Mlynchak, M. G., Thome, K. J., Leroy, S., Corliss, J., Anderson, J. G., Ao, C. O., Bantges, R., Best, F., Bowman, K., Brindley, H., Butler, J. J., Collins, W., Dykema, J. A., Doelling, D. R., Feldman, D. R., Fox, N., 625 Huang, X., Holz, R., Huang, Y., Jin, Z., Jennings, D., Johnson, D. G., Jucks, K., Kato, S., Kirk-Davidoff, D. B., Knuteson, R., Kopp, G., Kratz, D. P., Liu, X., Lukashin, C., Mannucci, A. J., Phojanamongkolkij, N., Pilewskie, P., Ramaswamy, V., Revercomb, H., Rice, J., Roberts, Y., Roithmayr, C. M., Rose, F., Sandford, S., Shirley, E. L., Smith, W. L., Soden, B., Speth, P. W., Sun, W., Taylor, P. C., Tobin, D., and Xiong, X.: Achieving Climate Change Absolute Accuracy in Orbit, *Bull Am Meteorol Soc*, 94, 1519–1539, <https://doi.org/10.1175/BAMS-D-12-00149.1>, 2013.

630 Wild, M., Folini, D., Hakuba, M. Z., Schär, C., Seneviratne, S. I., Kato, S., Rutan, D., Ammann, C., Wood, E. F., and König-Langlo, G.: The energy balance over land and oceans: an assessment based on direct observations and CMIP5 climate models, *Clim Dyn*, 44, 3393–3429, <https://doi.org/10.1007/s00382-014-2430-z>, 2015.
